1 **Characterization of interstitial heterogeneity in the developing kidney**

2

3 Alicia R. England<sup>1,2,3,\*</sup>, Christopher P. Chaney<sup>2,\*</sup>, Amrita Das<sup>4,\*</sup>, Mohita Patel<sup>5</sup>, Alicia  
4 Malewsak<sup>6</sup>, Daniel Armendariz<sup>7,3</sup>, Gary Hon<sup>7,3</sup>, Douglas Strand<sup>7</sup>, Keri Drake<sup>5</sup>, Thomas J.  
5 Carroll<sup>1,2,3^</sup>

6

7 <sup>1</sup>Department of Molecular Biology, Center for Regenerative Science and Medicine,  
8 University of Texas Southwestern Medical Center, Dallas, TX, 75390, USA

9 <sup>2</sup>Department of Internal Medicine, Division of Nephrology, University of Texas  
10 Southwestern Medical Center, Dallas, TX, 75390, USA

11 <sup>3</sup>Hamon Center for Regenerative Science and Medicine, Dallas, TX, 75390, USA.

12 <sup>4</sup>Amgen, Inc., San Francisco, CA

13 <sup>5</sup>Division of Pediatric Nephrology, University of Texas Southwestern Medical Center,  
14 Dallas, TX, 75390, USA

15 <sup>6</sup>Department of Urology, UT Southwestern Medical Center, Dallas, TX 75390, USA.

16 <sup>7</sup>Laboratory of Regulatory Genomics, Cecil H. and Ida Green Center for Reproductive  
17 Biology Sciences, Division of Basic Reproductive Biology Research, Department of  
18 Obstetrics and Gynecology, University of Texas Southwestern Medical Center, Dallas,  
19 TX, 75390, USA.

20 <sup>^</sup>Corresponding author, [Thomas.Carroll@UTSouthwestern.edu](mailto:Thomas.Carroll@UTSouthwestern.edu)

21 \*Denotes equal contribution

22

23 **ABSTRACT**

24 Kidney formation requires the coordinated growth of multiple cell types including the  
25 collecting ducts, nephrons, vasculature and interstitium. There has been a long-held  
26 belief that interactions between the progenitors of the collecting ducts and nephrons are  
27 primarily responsible for development of this organ. However, over the last several  
28 years, it has become increasingly clear that multiple aspects of kidney development  
29 require signaling from the interstitium. How the interstitium orchestrates these various  
30 roles is still poorly understood. We show that during development, the interstitium is a  
31 highly heterogeneous, patterned population of cells that occupies distinct positions  
32 correlated to the adjacent parenchyma. Our analysis indicates that the heterogeneity is  
33 not a mere reflection of different stages in a linear developmental trajectory but instead  
34 represents several novel differentiated cell states. Further, we find that beta-catenin has  
35 a cell autonomous role in the development of a medullary subset of the interstitium and  
36 that this non-autonomously affects the development of the adjacent epithelia. These  
37 findings suggest the intriguing possibility that the different interstitial subtypes may  
38 create microenvironments that play unique roles in development of the adjacent  
39 epithelia and endothelia.

## 40 INTRODUCTION

41 Development of the kidney relies on interactions between the metanephric  
42 mesenchyme (MM) and an epithelial structure known as the ureteric bud (UB) [1, 2].  
43 The MM is a heterogeneous population of cells containing at least two cell type specific  
44 progenitor populations. A Six2/Cited1+ nephron progenitor cell (NPC) population is  
45 located within the MM directly adjacent to the tips of the UB [3, 4]. NPCs undergo  
46 mesenchymal-to-epithelial transition (MET) to ultimately form the nephron, the  
47 functional unit of the kidney, which is patterned into functionally distinct segments: the  
48 glomerulus, proximal tubule, loop of Henle, distal tubule and connecting segment [3, 4].  
49 There is a second molecularly distinct progenitor population within the MM that  
50 surrounds the NPCs. These Forkhead box D1- (*Foxd1*, formerly known as *BF2*)  
51 expressing cells have been shown to give rise to a significant percentage of the  
52 interstitium and the renal capsule [5-7].

53 During development, the UB coordinates the proliferation and differentiation of  
54 nephron progenitors into the precursor of the nephron, the renal vesicle [8, 9].  
55 Reciprocally, the MM (both the NPC and interstitial populations) induces the outgrowth  
56 and branching of the UB until the UB has formed an arborized epithelial network of  
57 tubules referred to as the collecting ducts [1, 10]. In addition to its role in regulating  
58 branching, the interstitium plays further roles in differentiation of the nephron progenitor  
59 population and patterning of the vasculature [5, 11-13]. Although frequently referred to  
60 in broad terms, the adult interstitial cell population includes renal fibroblasts and various  
61 smooth muscle cell types including vascular smooth muscle, pericytes, mesangial cells  
62 and the smooth muscle of the ureter and renal pelvis [6, 7]. Moreover, much of the

63 endocrine function of the kidney, including the production of renin and erythropoietin, is  
64 performed by interstitial cells [14, 15].

65         Given that the interstitium has diverse roles in renal development, structure and  
66 function, it seems likely that this cell population is molecularly heterogeneous. However,  
67 extensive molecular characterization has been lacking. Here, we perform single cell  
68 RNA sequencing of Foxd1-derived interstitial cells from E18.5 mouse kidneys in order to  
69 define the heterogeneity and thus facilitate further inquiry into the development and  
70 function of these cells.

71         Our analysis revealed striking transcriptional heterogeneity in the renal  
72 interstitium, identifying 17 unique cellular clusters. Antisense mRNA *in situ* hybridization  
73 analysis demonstrated unexpected regionalization, uncovering at least 12 histologically  
74 similar but anatomically distinct domains along the cortical medullary axis. Importantly,  
75 comparison of mouse and human single cell data reveals that the interstitial  
76 heterogeneity is conserved. Analysis of transcription factor activity (regulons) showed  
77 cluster specificity, with the transcriptional regulator beta-catenin active within a  
78 medullary sub-population of stroma. Genetic ablation studies showed beta-catenin  
79 played a cell autonomous role in formation of this medullary interstitial region and a non-  
80 autonomous role in the development of the adjacent medullary epithelia. These findings  
81 stimulate multiple questions regarding the nature of interstitial-parenchymal crosstalk in  
82 development, physiology, homeostasis and disease of the embryonic and adult kidney.

83

## 84 **RESULTS**

### 85 **Transcriptional analysis of the renal interstitium reveals molecular heterogeneity**

86           Interstitial/stromal cells are present throughout the kidney extending from the  
87 cortex to the most medullary regions of the renal papillae and surrounding the ureter.  
88 Within the interstitium, three molecularly and anatomically distinct regions of interstitial  
89 cells have previously been defined. These populations were annotated as nephrogenic,  
90 cortical and medullary interstitium based on their unique anatomical positions [16].  
91 However, more detailed examination of kidneys stained with various antibodies to  
92 proteins expressed in interstitial cells suggests that the degree of heterogeneity may be  
93 under-estimated [7]. For example, Foxd1 is expressed in a small subset of the interstitial  
94 cells cortical and lateral to the Six2-positive cap mesenchyme. Expression ceases  
95 adjacent to the renal vesicles (Figure 1a-b). In comparison, Tenascin-C is expressed in a  
96 subset of Foxd1 expressing cells lateral to the Six2-positive cap mesenchyme but is not  
97 expressed in the cells cortical to the cap. Tenascin-C expression extends into the cells  
98 adjacent to the proximal tubule (Figure 1c-d). Slug expression appears to be largely, if  
99 not completely, non-overlapping with Foxd1, marking a subset of interstitial cells just  
100 medial to the cap mesenchyme and extending medially to the level of the proximal  
101 tubules (Figure 1 e-f). Acta2 is detectable in the interstitial cells adjacent to the proximal  
102 tubules but is not detectable in the medullary interstitium of the renal papillae (Figure  
103 1g-h). CDKN1c is expressed in the majority, if not all, interstitial cells of the renal papilla.  
104 Lef1 is expressed in interstitial cells extending from just medullary to the renal vesicles  
105 through the entire papillae (Figure 1i-j). However, in contrast to CDKN1c, Lef1 appears  
106 to only be expressed in a single layer of interstitial cells that lie directly adjacent to the  
107 collecting ducts (Figure 1k-l). Tbx18 is only expressed in interstitial cells surrounding the  
108 renal pelvis and ureter (Figure 1m). Interestingly, of all the proteins discussed, only

109 Acta2 is expressed in the smooth muscle surrounding the vasculature and mesangial  
110 cells, both of which are Foxd1-derived interstitial cell types. Based on the spatial  
111 differences in expression of the proteins described above and recent studies, one would  
112 predict that there are may be as many as 10 distinct interstitial cell types within the  
113 kidney.

114 To gain a more complete understanding of interstitial heterogeneity within the  
115 developing kidney, we performed single cell RNA sequencing (scRNA-seq) on  
116 dissociated E18.5 wild type mouse kidneys. Although previous single cell analyses have  
117 been performed on both adult and embryonic kidneys [17-20], the interstitium  
118 represents a relatively small percentage of the total number of cells and thus has been  
119 under-represented. To enrich for interstitium, we purified cells via fluorescence activated  
120 cell sorting (FACS) from Foxd1Cre;Rosa-Tomato kidneys as Foxd1-positive cells have  
121 been shown to give rise to the majority of the renal interstitium [7, 21]. Further, because  
122 recent studies suggest that a sub-population of the interstitium (in particular the ureteric  
123 fibroblasts/smooth muscle) is derived from a distinct, Tbx18-positive progenitor, and  
124 thus might not be present in our isolated cells, we bioinformatically isolated interstitial  
125 cells from published datasets derived from whole kidneys (1,482 total cells) and  
126 included them in our analysis [17]. Unsupervised clustering was performed on all  
127 sequenced cells that met quality control standards. After pre-processing, quality control,  
128 normalization for cell cycle phase and lineage filtering, 8,683 interstitial cells were  
129 selected for further analysis.

130 Shared nearest neighbor clustering based on similarity between gene expression  
131 profiles revealed 17 distinct clusters of cells that were identified as “interstitial” (Figure 2,

132 Supplemental Figure 1a, Supplemental Video 1 and Supplemental Video 2). Clusters  
133 ranged in size from 16 cells (cluster 13) to 1564 cells (cluster 10).

134 Importantly, the only cluster that was not derived from the Foxd1-Cre isolated  
135 cells was cluster 13, which represents the Tbx18-derived ureteric interstitium. These  
136 data suggest that our analysis includes most, if not all, renal interstitial cells, and that  
137 this population shows a high level of heterogeneity. We next sought to validate this  
138 heterogeneity in situ in order to gain insight into the significance and nature of the  
139 cellular diversity.

#### 140 **Renal interstitium shows spatial heterogeneity**

141 To validate our results, we performed section in situ hybridization with over 50  
142 differentially expressed genes (DEGs) from each cluster (Figure 3-5, Supplemental  
143 Figure 1c-k and Supplemental Table 1, and Supplemental Table 2). Candidates were  
144 chosen based on relative abundance and any identified regionalized expression  
145 observed in publicly available databases [22-24]. Although all DEGs examined were  
146 expressed in the interstitium, some that were indicated as being differentially expressed  
147 between clusters did not show cell type specific expression by in situ hybridization  
148 (Supplemental Table 1 and Supplemental Table 2). Instead, these genes appeared to  
149 be ubiquitously expressed suggesting that their being called as a DEG was due to  
150 differences in mRNA levels between different cell types rather than cell type specificity.  
151 A subset of the queried genes were expressed broadly in epithelial and/or endothelial  
152 populations as well as the interstitium. Both of these classes of genes were largely  
153 excluded from further analysis. Several DEGs appeared to be enriched in the  
154 interstitium over other cell types and showed regionalized expression (see below). It is

155 important to note that very few DEGs were detected in only a single cluster. Although  
156 individual examples for each cluster are presented in the main figures, anatomical  
157 assignment of clusters is based on in situ data from multiple DEGs (see supplemental  
158 Table 2). All in situ data will be available at the Re-Building a Kidney website  
159 (<https://www.rebuildingakidney.org/>).

160 Clusters 1-3 are highlighted by expression of *Foxd1*, a gene known to be  
161 expressed in the cortical interstitium (Figure 4a-b, Supplemental Figure 1d,  
162 Supplemental Table 1) and podocytes, a non-interstitial cell type. *Foxd1* expressing  
163 cells that were disjoint from interstitial cells and expressed typical podocyte markers,  
164 e.g. *Podxl* and *Nphs2*, were excluded from further analysis.

165 To gain insight into the nature of clusters 1-3, we assayed the expression of  
166 several mRNAs that were differentially expressed between the clusters including  
167 *Netrin1* (clusters 1 and 3), *Fibin* (clusters 2 and 3), *Smoc2* (cluster 1) and *Dlk1* (cluster  
168 1) (Figure 3, Figure 4a-b', Supplemental Figure 1c-g, Supplemental Table 1). *Netrin*  
169 (clusters 1 and 3) was uniformly expressed in the interstitial cells cortical but not lateral  
170 to the cap mesenchyme (Figure 3c-d). *Fibin* (clusters 2 and 3), shows expression in a  
171 subset of the cortical interstitium as well as expression in cells that lie lateral to the cap  
172 mesenchyme (Figure 3e-f). *Smoc2* (clusters 1 and 9) and *Dlk1* (cluster 1, 13 and 16)  
173 both showed mosaic expression in the cortical most interstitium (Figure 3g-j) as well as  
174 other, non-cortical cell types (described below). Due to the limited resolution of in situ  
175 hybridization, we could not determine whether *Fibin* was expressed in distinct cell types  
176 from *Smoc2* and *Dlk1*. However, this analysis suggests that the cortical *Foxd1*  
177 expressing cells are not molecularly homogeneous and these observations suggest that



178 clusters 1 and 3 are unique subsets within the cortical-most subset of Foxd1-expressing  
179 cells and cluster 2 represents a lateral sub-population of Foxd1-expressing cells. Thus,  
180 the region of stroma previously annotated as “cortical” appears to have at least 3  
181 molecularly distinct cell types.

182 Genes present in clusters 4-5 were expressed on the medullary side of the  
183 ureteric bud tips surrounding the newly forming renal vesicles and correlated with a  
184 region of interstitium previously referred to as the nephrogenic interstitium  
185 (Supplemental Table 1 and data not shown). These clusters were highlighted by the  
186 expression of multiple genes involved in cell division (even after controlling for cell cycle  
187 phase).

188 Lysyl oxidase (LOX, clusters 6-8) was enriched in the interstitium adjacent to the  
189 most-medullary proximal tubules (Figure 4c-d', Supplemental Figure 1h Supplemental  
190 Table 1). Clca3a1 (cluster 7) was also enriched in cells adjacent to the proximal tubules  
191 although it appeared not to be expressed adjacent to the more medullary proximal  
192 tubules and its expression appeared more mosaic than Lox (Figure 4e-f').

193 Smoc2 (Cluster 9) is enriched in a population of interstitium that lies just  
194 medullary to the proximal tubule in the outer medulla (Figure 4g-h', Supplemental  
195 Figure1g, Supplemental Table 1). Smoc2 expressing cells do not appear to expand  
196 cortically into the region adjacent to the proximal tubules.

197 The mRNA for Proenkephalin (*Penk*, clusters 9-12) is most intense in a  
198 population of interstitium just medullary to Smoc2 in the outer stripe of the inner medulla  
199 (Figure 4i-j', Supplemental Figure 1i, Supplemental Table 1). Although its expression

200 does appear to expand into more cortical populations of cells, it does not appear to  
201 overlap with *Smoc2*, *Lox* or *Clca3a1*.

202         *Wnt4* is enriched in clusters 11-12. In situ analysis shows that along with  
203 expression in the pre-tubular aggregates, it is highly expressed in the interstitium of the  
204 papillary region of the kidney, a region previously referred to as the medullary  
205 interstitium. (Figure 4k-l', Supplemental Figure 1j, Supplemental Table 1 and data not  
206 shown).

207         Cluster 13 is the only population that was not derived from the *Foxd1* lineage  
208 sorted cells. All cluster 13 cells were derived from the whole kidney single cell data  
209 generated by Combes and colleagues [17]. Of note, cluster 13 was composed of only  
210 16 cells, most likely a reflection of the relatively small numbers of interstitial cells  
211 included in the whole organ studies. As expected, genes present in cluster 13 (e.g. *Dlk1*  
212 and *Tbx18*) were predominantly expressed in the interstitium adjacent to the ureter  
213 (Figure 1m, Figure 5a-b, Supplemental Figure 1c, Supplemental Table 1).

214         Clusters 14-16 showed a high degree of overlap in gene expression. All three  
215 clusters expressed several genes that are accepted markers of perivascular cells. To  
216 determine if the clusters represented unique perivascular cell types, we performed in  
217 situ hybridization with cluster specific DEGs. *Akr1b7* and *Ren1* are both enriched in  
218 cluster 14 over other clusters and show expression in vascular smooth muscle as well  
219 as cells within the juxtaglomerular apparatus (Figure 5c-d, Supplemental Figure 1b,  
220 Supplemental Table 1, and data not shown). *Dlk1* (clusters 15 and 16 along with  
221 clusters 1 and 13) was detectable in the glomerular mesangial cells (Figure 5a-b,  
222 Supplemental Figure 1c, Supplemental Table 1). *Igf1* was enriched in cluster 15 and

223 showed expression in a subset of interstitial cells in the papillary region of the kidney,  
224 similar to the anatomical location assigned to cluster 10. Based on these observations  
225 along with gene set enrichment analysis [28] based on automated text-mining of  
226 protein-cell type associations from the biomedical literature [29] (Supplemental Figure  
227 2), we suggest that cluster 14 represent vascular smooth muscle, cluster 15 represents  
228 a papillary pericyte population and cluster 16 represents mesangial cells. However,  
229 given the molecular similarity between these three cell types, it is possible that greater  
230 sequencing depth/clustering will alter these annotations.

231 Cluster 17 contained many genes that were also DEGs in other clusters.  
232 Although we did identify a specific DEG list for cluster 17, the most differentially  
233 expressed genes encoded mitochondrial mRNAs and we have not been able to produce  
234 strong signal with any of these probes (Supplemental Table 1).

235 In all, analysis of the transcriptome of single interstitial cells generated 17  
236 clusters of cells that have been assigned to at least 12 anatomically distinct cell types.

237

238 **Pseudo-time analysis suggests multiple distinct developmental trajectories within**  
239 **the interstitium**

240 Although interstitial heterogeneity is not completely unexpected, the  
241 heterogeneity in the histologically indistinguishable cells spanning the cortical-medullary  
242 axis was surprising. A simple explanation of the identity of these cells is that they merely  
243 represent different stages in a linear developmental trajectory from a cortical-most  
244 progenitor to a more medullary, differentiated cell type. To gain insight into the lineage  
245 relationship of the different clusters, we employed the complementary approaches of

246 RNA velocity [25] and pseudotemporal ordering [26]. Briefly, RNA velocity is determined  
247 by modeling the relationship between the unspliced and spliced forms of a transcript,  
248 with the reasonable assumption that a cell actively transcribing a gene will have a  
249 higher ratio of unspliced to spliced transcripts and so a higher “RNA velocity”.  
250 Conversely, cells that are not actively transcribing a gene (but still maintain its  
251 expression) will have a lower ratio of unspliced to spliced transcripts as the majority of  
252 mRNA will represent processed transcripts (lower RNA velocity). Using single genes as  
253 representative examples, this analysis indicates that Lef1 is actively transcribed in  
254 cluster 10 and stabilizes in clusters 11 and 12 suggesting that clusters 11 and 12  
255 represent cells derived from cluster 10 (Supplemental Figure 3a-b). In comparison,  
256 Smoc2 is actively transcribed and processed in cells present within cluster 9 but not in  
257 any other clusters (other than the Foxd1+ progenitor cells), suggesting cluster 9  
258 represents a terminal differentiation state (Supplemental Figure 3c-d). Extending this  
259 model to all genes and all cells within the purified interstitium, we created an RNA  
260 velocity field to predict transitions between clusters (Supplemental Figure 3e). It is  
261 important to note that the kidney capsule, which is derived from Foxd1-expressing cells  
262 [7], was removed from our kidneys prior to cell sorting and thus is not included in our  
263 analysis. Therefore, we cannot comment on the derivation of this cell type at this time.  
264 We also ultimately excluded the ureteral smooth muscle cells (cluster 13) from this  
265 analysis as they did not show a relationship with any of the other clusters, as expected  
266 from their independent origins [21].

267         Simulation of a reverse Markov process with RNA velocity-based transition  
268 probabilities (please refer to Materials and Methods for a more complete description)

269 allowed us to identify a group of cells that likely represented the ontological parent of  
270 the analyzed interstitial cells (Figure 6a). After selecting one such parent or “root” cell,  
271 we were able to pseudotemporally order the cells. Annotating the diffusion map with  
272 pseudotime demonstrated that the parent/root population ramifies into multiple distinct  
273 branches that develop simultaneously rather than following a single linear differentiation  
274 trajectory (Supplemental figure 3f).

275         The integration of the RNA-velocity and pseudotime analyses generates a model  
276 wherein at least two of the distinct clusters of Foxd1-positive “progenitor” cells undergo  
277 independent branching events to give rise to the cycling/proliferating cells and at least 6  
278 different trajectories that we refer to as the inner medullary fibroblast, outer medullary  
279 fibroblast, vascular smooth muscle, proximal tubule interstitium, pericyte and mesangial  
280 subtypes (Figure 6b). The vascular smooth muscle cluster appears more distantly  
281 related than the other cell types consistent with its distinct differentiation profile (Figure  
282 6b and Supplemental video 3). Interestingly, clusters 6 appears to be located at a  
283 bifucation or trifucation point that gives rise to clusters 14, 15 and 16. This data  
284 suggests that the distinct interstitial subtypes do not represent transient stages in a  
285 linear developmental trajectory. Instead, these cells appear to represent previously  
286 undescribed, anatomically distinct interstitial cell types of distinct lineages.

287         Although frequently referred to as a homogeneous population of cells that  
288 functions primarily as a scaffold, several recent studies have shown that in various  
289 systems, the interstitium sets up unique microenvironmental niches that direct tissue  
290 development and/or maintenance and can contribute to pathological conditions [27-34].  
291 Indeed, within the kidney, studies have shown that the interstitium is important in

292 numerous developmental processes affecting both the epithelia and endothelia [5, 11-  
293 13]. We next sought to re-visit previous work in light of our current findings.

### 294 **Interstitial pattern affects development of the renal parenchyma**

295         Several transcriptional regulators have been shown to be expressed in and  
296 necessary for the development of the stroma. To determine if any of these factors were  
297 active in specific stromal subtypes, we employed the SCENIC package to reconstruct  
298 gene regulatory networks and measure their activity within cells and so within the cells'  
299 parent clusters (Figure 7) [35]. Strikingly, certain transcriptional signatures (aka  
300 regulons) were active in distinct clusters or groups of clusters while inactive in others.  
301 Interestingly, we found that the Lef1 regulon was predominantly active in clusters 8-12  
302 (Figure 8a), which represents much of the medullary interstitium (Figure 5). Previous  
303 studies have shown that inactivation of beta-catenin in the interstitial progenitor  
304 population (using Foxd1Cre) leads to defects in the expression of several genes within  
305 the stroma, especially beta-catenin targets [36]. To test whether beta-catenin was  
306 necessary for formation of specific stromal subtypes (versus a general stromal defect),  
307 we assessed the expression of regionalized genes in Foxd1Cre;catnb<sup>-flox</sup> kidneys.  
308 Expression of genes normally expressed in clusters 1-7 (clusters where beta-catenin is  
309 not active) appeared unaffected or even expanded in Foxd1Cre;catnb<sup>-flox</sup> mutants  
310 (Figure 8b-d, h-j). In contrast, genes expressed in clusters 8-12 were markedly reduced  
311 or undetectable (Figure 8e-f, k-l) in mutants. The absence of medullary interstitium  
312 (clusters 8-12) correlated with a severe deficit in the formation of the epithelia (including  
313 the loop of Henle) that lay adjacent to these zones while the epithelia that lay adjacent

314 to the unaffected cortical interstitium (including the proximal tubules) appeared to form  
315 normally, as previously reported by Yu et al. [36] (Figure 8g, m).

316

317 **Human fetal kidney interstitium shows a similar degree of heterogeneity to the**  
318 **mouse**

319 Recently, several groups have employed single cell RNA sequencing on human  
320 fetal kidney at different stages [37]. While analyzing the nephrogenic region of fetal  
321 kidneys, which contains cells from multiple lineages, only 5 unique interstitial sub-  
322 clusters were identified [37]. Thus, we wondered whether extensive interstitial  
323 heterogeneity is unique to the mouse.

324 To understand whether interstitial heterogeneity is a generalizable phenomenon  
325 between these two species, we reanalyzed previously published [38, 39] week 17  
326 human fetal kidney scRNA seq data. After identifying the major cell populations within  
327 the data (epithelia, endothelia, leukocytes, etc.), we bioinformatically isolated the cells  
328 defined as interstitium (see methods). We then deployed the same clustering technique  
329 used to cluster mouse interstitium on the interstitium of the human fetal kidney. We find  
330 that the interstitium of the cortical region of human fetal kidney segments into 13  
331 molecularly distinct clusters (Figure 9a). Although the human data set was limited to  
332 more cortical cell populations, we were able to identify almost as many unique clusters  
333 as found in whole embryonic kidney. When the cluster assignments from E18.5 mouse  
334 interstitial cells were mapped onto the 17-week human interstitial cells, the majority  
335 were found to be represented in the human data although they did not resolve as clearly  
336 (Figure 9b). There are likely several factors underlying this imperfect alignment

337 including incomplete sampling in the human data, divergence between developmental  
338 time scales and time points between mouse and human and fewer cells available for  
339 analysis in the human dataset resulting in less resolving power. Evidence of the  
340 sampling bias is evident in that we did not identify any human cells that were analogous  
341 to cluster 13, the most medullary interstitium. These data indicate that renal interstitial  
342 heterogeneity is a generalizable characteristic between mouse and human.

343

## 344 **DISCUSSION**

345 Although known to play a role in providing physical support, growing evidence  
346 from multiple systems indicates that interstitial cells play active roles in tissue  
347 development, maintenance and disease. Within the developing kidney, non-  
348 autonomous roles for the interstitium have been identified in ureteric bud branching,  
349 nephron differentiation and blood vessel formation [5, 11-13]. Mechanistic insight into  
350 how the interstitium has so many distinct functions has been hampered by a poorly  
351 defined transcriptome. Here, using single cell RNA-sequencing combined with *in situ*  
352 hybridization, we have generated a map of interstitial gene expression in the E18.5  
353 kidney. Our analysis shows a previously unappreciated level of heterogeneity in the  
354 interstitium of the developing mouse kidney. Analysis of human embryonic interstitial  
355 cells show correspondence in heterogeneity found in the embryonic mouse.

356 While previous work characterizing the heterogeneity of the developing mouse  
357 kidney uncovered 4 interstitial clusters (1,482 cells) [17], our informed analysis identified  
358 17 distinct clusters that we were able to spatially resolve into at least 12 anatomically  
359 distinct subtypes. Additional analysis will be required to determine whether the 5



360 remaining clusters represent additional unique cell types or the data is currently  
361 overclustered. For example, we were not able to obtain signal from in situ hybridization  
362 with any DEGs specific to cluster 17, a population enriched for mitochondrial genes.  
363 Thus, it is possible that this cluster represents an artifact of the dissociation protocol.  
364 However, it is also worth noting that although immunostaining identified an interstitial  
365 cell type associated with the collecting ducts, our clustering did not conclusively identify  
366 these cells. It is possible that they lie within one of the medullary populations (12 or 13)  
367 or alternatively, that rather than being over-clustered, our data is under-clustered. We  
368 think it is likely that higher resolution techniques (e.g. single cell resolution in situ  
369 hybridization, antibody staining with or reporter gene generation from cluster specific  
370 DEGs) will resolve additional unique cell types. For example, there are three clusters  
371 containing genes expressed in the interstitium surrounding the proximal tubules.  
372 Although there do appear to be spatial differences in the expression of some proximal  
373 tubule interstitial genes, without cellular resolution, we cannot at this point determine  
374 whether these cells represent unique cell types. The fact that one of the, cluster 6,  
375 shows similarity to and is predicted to be the parent of clusters 14, 15 and 16, suggests  
376 that this cell type may represent a spatially distinct mural cell.

377         Unexpectedly, we found at least 3 molecularly distinct clusters within the Foxd1  
378 expression domain. This observation raises the question of the identity of the true  
379 interstitial progenitor cell. One possibility that is supported by our RNA velocity  
380 analysis, is that rather than containing a single multipotent progenitor cell, the Foxd1  
381 domain is comprised of several lineage restricted progenitors. Testing this will require

382 more detailed molecular characterization as well as lineage tracing with cell type  
383 specific Cre drivers.

384         Interestingly, our analysis identified several zones of histologically  
385 indistinguishable but molecularly distinct fibroblast-like cell types that occupy unique  
386 spatial locations along the cortical medullary axis, where they correlate with distinct  
387 anatomical regions in the adjacent parenchyma. By analyzing our transcriptomic data,  
388 we were able to identify signaling pathways unique to the distinct interstitial clusters.  
389 Reanalysis of beta-catenin mutant interstitium reveals a unique role for this factor in the  
390 development of the papillary stroma, which secondarily affected the development of the  
391 adjacent epithelia. Of note, previous work has shown that mesenchymal cells play  
392 instructive roles in patterning the adjacent epithelia during development of various organ  
393 systems including patterning of the vertebrate gut tube [40-43]. The close correlation of  
394 the distinct kidney interstitial cell types with the functional subdomains within the  
395 nephron raises the intriguing possibility of stromal-epithelial cross talk that is involved in  
396 the patterning and/or differentiation of the kidney parenchyma. Although several studies  
397 have revealed cell autonomous mechanisms underlying nephron patterning, it is  
398 possible that distinct interstitial subpopulations produce factors that interact with intrinsic  
399 pathways to assure proper position and relative size and spacing of the nephron  
400 segments with the adjacent collecting ducts and associated renal vasculature. RNA-seq  
401 data reveals multiple growth factors, small molecules, extracellular matrix components  
402 and metabolites that appear to be regionally produced. Further genetic analysis will be  
403 required to test specific roles.

404           Finally, as the adult kidney shows exquisite patterning along the  
405 cortical/medullary axis, it will be of great interest to determine whether a similar degree  
406 of heterogeneity and pattern exists in the adult interstitium and how this pattern  
407 correlates to normal anatomy, physiology, injury, regeneration and disease state. Given  
408 the growing evidence of the essential nature of the interstitium in multiple processes  
409 [27-34], a similar analysis of interstitial heterogeneity in different organ systems at  
410 different stages may reveal that the interstitium's role in patterning and morphogenesis  
411 is a generalizable principle.

## 412 **MATERIALS and METHODS**

### 413 *Mice*

414 All animals were housed, maintained and used according to protocols approved by the  
415 Institutional Animal Care and Use Committees at the University of Texas Southwestern  
416 Medical Center and following the guidelines from the NCI-Frederick Animal Care and  
417 Use Committee. For each experiment, female mice of 7–8 weeks of age were crossed  
418 with a male of 9–10 weeks of age. Plugs were checked and the embryos were collected  
419 at the desired time points for further analysis. Noon of the day on which the mating plug  
420 was observed was designated embryonic day (E) 0.5. The following mice were used in  
421 the studies described: *Foxd1*Cre (JAX Stock #012463), *Rosa26*Tomato (JAX Stock  
422 #007909), *Rosa26*DTA (JAX Stock #006331), *Rosa26*YFP (JAX Stock #006148), *catnb*  
423 null and *catnb* flox [44].

### 424 *In situ* hybridization

425 For section *in situ* hybridization, kidneys isolated at specific stages were fixed overnight  
426 in 4% PFA (in PBS) at 4 °C and cryopreserved in 30% sucrose. Tissues were frozen in  
427 OCT (Tissue Tek) and sectioned at 10 µm. Sections were subjected to *in situ*  
428 hybridization as previously described [9]. The following antisense RNA probes against  
429 *Foxd1*, *Lox*, *Smoc2*, *Penk*, *Wnt4*, *Lef1*, *Tgfb1i1*, were linearized and transcribed as  
430 previously described. Plasmids were unavailable for *Dlk1* and *Akr1b7*; thus, single  
431 stranded DNA for each gene was purchased with the T7 RNA polymerase binding site  
432 in the reverse orientation added to 3' end of the gene sequence. These probes were  
433 made through RNA transcription of these single stranded DNA gblocks using T7  
434 polymerase.

435 *Histology, immunohistochemistry and immunocytochemistry*

436 Kidneys isolated at birth were formaldehyde fixed and paraffin embedded. Sections  
437 (5  $\mu$ m) from paraffin-embedded kidneys were subjected to haematoxylin and eosin  
438 staining. For immunohistochemistry, fixed kidneys were embedded in OCT and  
439 sectioned on a cryostat (10  $\mu$ m). Frozen sections were washed with PBS and blocked  
440 with 5% serum for an hour at room temperature and incubated with primary antibodies  
441 at 4 °C overnight. After primary incubation, sections were washed and incubated with  
442 HRP-tagged secondary antibodies for 1 h at room temperature. Further, signal was  
443 detected with tyramide amplification. Slides were washed and re-stained with additional  
444 markers according to the above-mentioned immunohistochemistry protocol. Slides were  
445 then mounted with Vectashield and images were captured with a Zeis LSM500,  
446 ZeisLSM700 or a Nikon A1R confocal microscope. The following antibodies were used:

| Protein Target          | Antibody Product ID                                 | Dilution |
|-------------------------|-----------------------------------------------------|----------|
| Acta2 (aSMA)            | Sigma-Aldrich Cat# A2547, RRID:AB_476701            | 1:250    |
| Cdkn1c                  | ThermoFisher Cat# PA5-34432, RRID:AB_2551784        | 1:250    |
| DBA                     | Vector Laboratories Cat# B-1035, RRID:AB_2314288    | 1:500    |
| E-Cadherin              | Invitrogen Cat#13-1900, RRID:AB_2533005             | 1:250    |
| E-Cadherin              | BD Biosciences Cat# 610182, RRID:AB_397581          | 1:250    |
| Foxd1                   | Santa Cruz Cat# SC-47585; RRID:AB_2105295           | 1:750    |
| GFP                     | Aves Labs Cat# GFP-1020, RRID:AB_10000240           | 1:500    |
| Laminin                 | Sigma-Aldrich Cat# L9393, RRID:AB_477163            | 1:500    |
| Lef1                    | Cell Signaling Technology Cat# 2230, RRID:AB_823558 | 1:250    |
| LTL                     | Vector Laboratories Cat# B-1325, RRID:AB_2336558    | 1:500    |
| Meis1/2                 | Santa Cruz Cat# SC-10599, RRID:AB_2143020           | 1:750    |
| Meis1/2/3               | Active Motif Cat# 39795, RRID:AB_2750570            | 1:100    |
| pan Cytokeratin<br>(CK) | Sigma-Aldrich Cat# C2562, RRID:AB_476839            | 1:500    |
| PDGFr $\beta$           | Cell Signaling Cat# 3169S, RRID:AB_2162497          | 1:250    |
| Six2                    | Proteintech Group Cat# 11562-1-AP, RRID:AB_2189084  | 1:500    |

|       |                                                      |       |
|-------|------------------------------------------------------|-------|
| Slug  | Cell Signaling Technology Cat# 9585, RRID:AB_2239535 | 1:250 |
| Tbx18 | Santa Cruz Cat# SC-17869, RRID:AB_2200374            | 1:100 |
| THP   | Alfa Aesar Cat# J65429                               | 1:500 |

447 ***Single cell sample preparation and sequencing***

448 E18.5 Foxd1Cre;Rosa26Tomato mouse kidneys were dissected in cold PBS without  
449 calcium or magnesium, Kidneys were cleaned and adrenal gland, capsule and ureters  
450 were removed.. Kidneys were washed in HBSS for 2 minutes at 37°C then minced  
451 using two razorblades on ice. The minced kidneys were digested for 8 minutes at 37C in  
452 2mL of 0.25% w/v Collagenase A/1% w/v Pancreatin (Sigma-Aldrich; Cat. 101378001,  
453 P1750), with manual dissociation via pipetting through a P1000 tip every 2 minutes. No  
454 more than 4 pairs of kidneys were dissociated in 2mL enzyme digest. Digestion was  
455 inactivated by adding 125ul serum. After pelleting the cells at 400g for 5 minutes, cells  
456 were resuspended in 1mL of AutoMACS Running Buffer (Miltenyi Biotec, Cat. 130-091-  
457 221) and passed through a 30 um pre-separation filter (Milteni Biotec, Cat. 130-041-  
458 407). Filters were immediately washed with 500ul AutoMACS Running Buffer. Cells  
459 were resuspended in 500uL AutoMACS Running Buffer and filtered at least 2 more  
460 times through a cell-strainer cap (Falcon, Cat. 352235) attached to a 5mL  
461 Polypropylene round bottom tube (Globe Scientific, Cat. 110428). Ten thousand  
462 Foxd1Cre;Rosa26Tomato+ cells, isolated via FACS, were run on a chromium 10x  
463 Single Cell Chip (10x Genomics). Libraries were prepared using Chromium Single Cell  
464 Library kit V2, and sequenced on an Illumina NextSeq using 75pb paired-end  
465 sequencing. Sequencing resulted in an average of 12,000 reads/cell and 3,000  
466 genes/cell. Upon acceptance, the single cell data presented in this manuscript will be  
467 deposited onto Gene Expression Omnibus and Rebuilding a Kidney databases.

468 ***Single cell data analysis***

469           When analyzing the single cell data collected from the experiments outlined  
470 above, we included, where possible, the dataset generated by Combes et al. obtained  
471 via NCBI's Gene Expression Omnibus under accession GSE108291 [17]. Each batch  
472 was processed independently using the *scrn* Bioconductor package [45]. Unfiltered  
473 feature-barcode matrices were generating by running the CellRanger count pipeline.  
474 Cells were called from empty droplets by testing for deviation of the expression profile  
475 for each cell from the ambient RNA pool [46]. Cells with large mitochondrial proportions,  
476 i.e. more than 3 mean-absolute deviations away from the median, were removed. Cells  
477 were pre-clustered, a deconvolution method was applied to compute size factors for all  
478 cells [47] and normalized log-expression values were calculated. Variance was  
479 partitioned into technical and biological components by assuming technical noise was  
480 Poisson-distributed and attributing any estimated variance in excess of that accounted  
481 for by a fitted Poisson trend to biological variation. The dimensionality of the data set  
482 was reduced by performing principal component analysis and discarding the later  
483 principal components for which the variance explained was less than variance  
484 attributable to technical noise.

485           Masking of biological effects by expression changes due to cell cycle phase were  
486 mitigated by blocking on this covariate. The cell cycle phase was inferred using the pair-  
487 based classifier implemented in the *cyclone* function of *scrn*. Corrected log-normalized  
488 expression counts were obtain by calling the `removeBatchEffect` from the *limma* [48]  
489 Bioconductor package with a design formula including G1 and G2M cell cycle phase  
490 scores as covariates.

491 A single set of features for batch correction were obtained by computing the  
492 average biological component of variation across batches and retaining those genes  
493 with a positive biological component. The batches were rescaled and log-normalized  
494 expression values recomputed after the size factors were adjusted for systemic  
495 differences in sequencing depth between batches. Batch effects were corrected by  
496 matching mutual nearest neighbors in the high-dimensional expression space [49]. The  
497 resulting reduced-dimensional representation of the data was used for all subsequent  
498 embeddings including t-SNE and UMAP.

499 Cells were clustered by building a shared nearest neighbor graph[50] and  
500 executing the Walktrap algorithm [51]. Differential gene expression analysis was  
501 performed using the two-part generalized linear model that concurrently models  
502 expression rate above background and expression mean implemented in MAST[52]. A  
503 one-versus-all strategy was employed comparing each cluster to all other identified  
504 interstitial clusters.

505 Gene sets for enrichment analysis were obtained from the TISSUES Text-mining  
506 Tissue Protein Expression Evidence Scores dataset [53] located at  
507 <http://amp.pharm.mssm.edu/Harmonizome/>. The gene sets were filtered to include only  
508 those genes with a standardized value greater than 1. Enrichment analysis was  
509 performed using the fgsea [54] Bioconductor package.

510 Week 17 human fetal kidney scRNA seq data was obtained from the Gene  
511 Expression Omnibus under series accession numbers GSE112570 and GSE124472  
512 [38, 39]. Cluster assignments were transferred from the E18.5 mouse kidney dataset to  
513 the 17-week human fetal kidney dataset using a neural network classifier constructed



514 using the Tensorflow system [55]. Graph regularization [56] considering eight shared  
515 nearest neighbors of each cell was used during training of a sequential network with two  
516 hidden layers, each containing 1024 hidden nodes, to classify the expression profiles of  
517 cells from the mouse dataset by cluster. Orthologue-mapped expression profiles of  
518 human cells as input to the classifier to assign each cell in the human dataset to mouse  
519 cluster with greatest similarity. Expression profiles were cosine-normalized prior to  
520 training or prediction. Only genes with a biological-to-technical variance ratio greater  
521 than zero were utilized for classification.

522 RNA velocity was calculated to analyze the dynamic relationships between  
523 identified cell states [25]. The analysis was limited to the replicate single cell datasets  
524 produced for this paper as BAM files were not available for the Combes, *et al.* dataset  
525 [17]. Read counts were partitioned between spliced, unspliced and ambiguous sets by  
526 calling *velocyto run10x* with an mm10 repeat mask obtained from the UCSC genome  
527 browser and the genome annotation file that came prepackaged with *cellranger*. The  
528 results of previously conducted cell filtering and feature selection were applied to these  
529 expression matrices. Normalization, principal component analysis, k-nearest neighbor  
530 smoothing, gamma fit, extrapolation, Markov process modelling and projection onto pre-  
531 defined low-dimensional embeddings were executed by calling the relevant functions  
532 from the *velocyto.analysis* module.

533 To reconcile clustering with trajectory inference, we performed partition-based  
534 graph abstraction (PAGA) to model the connectivity between clusters [57]. At cluster  
535 resolution, the edge-score threshold was varied until the graph was decomposed into  
536 connected components. Evaluation of marker gene expression within the components

537 permitted assignment of components to the categories epithelium, leukocyte,  
538 erythrocyte, endothelium and interstitium. In many cases, RNA velocity allowed for  
539 assigning a direction to the edges between clusters indicating a tendency of transition  
540 between the clusters.

541           Gene regulatory network reconstruction and measurement of regulon activity  
542 within each was conducted using SCENIC [35]. All cells of acceptable quality were used  
543 for network inference. The regulon activity was binarized using the following strategy.  
544 An attempt was made to model the regulon's activity as a mixture of two normal  
545 distributions using the mixtools R package. If such a model could be fit using  
546 expectation maximization, then those cells for which the regulon activity were assigned  
547 higher probability by the distribution with the greater mean were assigned a binarized  
548 regulon activity of one and zero otherwise. If a two-component mixture of normal  
549 distributions could not be fit, then a beta distribution was fit to the regulon's activity and  
550 cells for which the regulon's activity was greater than one mean absolute deviation  
551 above the mean were assigned a binarized regulon activity of one and zero otherwise.  
552

553 **Acknowledgements:** The authors would like to thank Ondine Cleaver, Denise  
554 Marciano, and Phoebe Carter for their insight in preparing this manuscript.

555

556 **Declaration of Interests:** The authors have no competing interests

557

558 **Funding:** This work was supported by a fellowship from the UT Southwestern Hamon  
559 Center for Regenerative Science and Medicine to ARF, NIH grants DK095057,  
560 DK106743, DK090127 to TJC and F31DK122670 to ARF and the UT Southwestern  
561 George O'Brien Kidney Research Core DK079328.

562

563 **Data Availability:** Upon acceptance, the single cell data presented in this manuscript  
564 will be deposited onto Gene Expression Omnibus and Rebuilding a Kidney databases  
565 with DOIs included.

566

567 **Author Contributions:** ARF designed experiments, performed experiments, analyzed  
568 data and wrote the manuscript. CPC designed experiments, analyzed data and wrote  
569 the manuscript. AD designed experiments, performed experiments and analyzed data,  
570 KD and MP designed experiments. CSK designed experiments, performed experiments,  
571 analyzed data and wrote the manuscript. AM, DA, DS, and GH prepared single cell  
572 libraries. TJC designed experiments, analyzed data and wrote the manuscript.

573 **REFERENCES**

- 574 1. Grobstein, C., *Inductive interaction in the development of the mouse metanephros*.  
575 *Journal of Experimental Zoology*, 1955. **130**(2): p. 319-339.
- 576 2. Grobstein, C., *Morphogenetic interaction between embryonic mouse tissues separated*  
577 *by a membrane filter*. *Nature*, 1953. **172**(4384): p. 869-70.
- 578 3. Boyle, S., et al., *Fate mapping using Cited1-CreERT2 mice demonstrates that the cap*  
579 *mesenchyme contains self-renewing progenitor cells and gives rise exclusively to*  
580 *nephronic epithelia*. *Dev Biol*, 2008. **313**(1): p. 234-45.
- 581 4. Kobayashi, A., et al., *Six2 defines and regulates a multipotent self-renewing nephron*  
582 *progenitor population throughout mammalian kidney development*. *Cell Stem Cell*, 2008.  
583 **3**(2): p. 169-81.
- 584 5. Hatini, V., et al., *Essential role of stromal mesenchyme in kidney morphogenesis*  
585 *revealed by targeted disruption of Winged Helix transcription factor BF-2*. *Genes Dev*,  
586 1996. **10**(12): p. 1467-78.
- 587 6. Humphreys, B.D., et al., *Fate tracing reveals the pericyte and not epithelial origin of*  
588 *myofibroblasts in kidney fibrosis*. *Am J Pathol*, 2010. **176**(1): p. 85-97.
- 589 7. Kobayashi, A., et al., *Identification of a multipotent self-renewing stromal progenitor*  
590 *population during mammalian kidney organogenesis*. *Stem Cell Reports*, 2014. **3**(4): p.  
591 650-62.
- 592 8. Carroll, T.J., et al., *Wnt9b plays a central role in the regulation of mesenchymal to*  
593 *epithelial transitions underlying organogenesis of the mammalian urogenital system*. *Dev*  
594 *Cell*, 2005. **9**(2): p. 283-92.
- 595 9. Karner, C.M., et al., *Canonical Wnt9b signaling balances progenitor cell expansion and*  
596 *differentiation during kidney development*. *Development*, 2011. **138**(7): p. 1247-57.
- 597 10. Grobstein, C., *Inductive epitheliomesenchymal interaction in cultured organ rudiments of*  
598 *the mouse*. *Science*, 1953. **118**(3054): p. 52-5.

- 599 11. Das, A., et al., *Stromal-epithelial crosstalk regulates kidney progenitor cell differentiation*.  
600 Nat Cell Biol, 2013. **15**(9): p. 1035-44.
- 601 12. Hum, S., et al., *Ablation of the renal stroma defines its critical role in nephron progenitor*  
602 *and vasculature patterning*. PLoS One, 2014. **9**(2): p. e88400.
- 603 13. Hurtado, R., et al., *Pbx1-dependent control of VMC differentiation kinetics underlies*  
604 *gross renal vascular patterning*. Development, 2015. **142**(15): p. 2653-64.
- 605 14. Maxwell, P.H., et al., *Sites of erythropoietin production*. Kidney Int, 1997. **51**(2): p. 393-  
606 401.
- 607 15. Berg, A.C., et al., *Pericytes synthesize renin*. World J Nephrol, 2013. **2**(1): p. 11-6.
- 608 16. Little, M.H., et al., *A high-resolution anatomical ontology of the developing murine*  
609 *genitourinary tract*. Gene Expr Patterns, 2007. **7**(6): p. 680-99.
- 610 17. Combes, A.N., et al., *Single cell analysis of the developing mouse kidney provides*  
611 *deeper insight into marker gene expression and ligand-receptor crosstalk*. Development,  
612 2019. **146**(12).
- 613 18. Wu, H., et al., *Advantages of Single-Nucleus over Single-Cell RNA Sequencing of Adult*  
614 *Kidney: Rare Cell Types and Novel Cell States Revealed in Fibrosis*. J Am Soc Nephrol,  
615 2019. **30**(1): p. 23-32.
- 616 19. Lindstrom, N.O., et al., *Single-Cell RNA Sequencing of the Adult Mouse Kidney: From*  
617 *Molecular Cataloging of Cell Types to Disease-Associated Predictions*. Am J Kidney Dis,  
618 2019. **73**(1): p. 140-142.
- 619 20. Park, J., et al., *Single-cell transcriptomics of the mouse kidney reveals potential cellular*  
620 *targets of kidney disease*. Science, 2018. **360**(6390): p. 758-763.
- 621 21. Bohnenpoll, T., et al., *Tbx18 expression demarcates multipotent precursor populations in*  
622 *the developing urogenital system but is exclusively required within the ureteric*  
623 *mesenchymal lineage to suppress a renal stromal fate*. Dev Biol, 2013. **380**(1): p. 25-36.

- 624 22. McMahon, A.P., et al., *GUDMAP: the genitourinary developmental molecular anatomy*  
625 *project*. J Am Soc Nephrol, 2008. **19**(4): p. 667-71.
- 626 23. Harding, S.D., et al., *The GUDMAP database--an online resource for genitourinary*  
627 *research*. Development, 2011. **138**(13): p. 2845-53.
- 628 24. Visel, A., C. Thaller, and G. Eichele, *GenePaint.org: an atlas of gene expression*  
629 *patterns in the mouse embryo*. Nucleic Acids Res, 2004. **32**(Database issue): p. D552-6.
- 630 25. La Manno, G., et al., *RNA velocity of single cells*. Nature, 2018. **560**(7719): p. 494-498.
- 631 26. Haghverdi, L., et al., *Diffusion pseudotime robustly reconstructs lineage branching*.  
632 Nature Methods, 2016. **13**: p. 845.
- 633 27. Benias, P.C., et al., *Structure and Distribution of an Unrecognized Interstitium in Human*  
634 *Tissues*. Sci Rep, 2018. **8**(1): p. 4947.
- 635 28. Liotta, L.A. and E.C. Kohn, *The microenvironment of the tumour-host interface*. Nature,  
636 2001. **411**(6835): p. 375-9.
- 637 29. Yu, V.W. and D.T. Scadden, *Hematopoietic Stem Cell and Its Bone Marrow Niche*. Curr  
638 Top Dev Biol, 2016. **118**: p. 21-44.
- 639 30. Greicius, G. and D.M. Virshup, *Stromal control of intestinal development and the stem*  
640 *cell niche*. Differentiation, 2019.
- 641 31. Driskell, R.R. and F.M. Watt, *Understanding fibroblast heterogeneity in the skin*. Trends  
642 Cell Biol, 2015. **25**(2): p. 92-9.
- 643 32. Driskell, R.R., et al., *Distinct fibroblast lineages determine dermal architecture in skin*  
644 *development and repair*. Nature, 2013. **504**(7479): p. 277-281.
- 645 33. De Palma, M., D. Biziato, and T.V. Petrova, *Microenvironmental regulation of tumour*  
646 *angiogenesis*. Nat Rev Cancer, 2017. **17**(8): p. 457-474.
- 647 34. Hepler, C., et al., *Identification of functionally distinct fibro-inflammatory and adipogenic*  
648 *stromal subpopulations in visceral adipose tissue of adult mice*. Elife, 2018. **7**.

- 649 35. Aibar, S., et al., *SCENIC: single-cell regulatory network inference and clustering*. Nat  
650 Methods, 2017. **14**(11): p. 1083-1086.
- 651 36. Yu, J., et al., *A Wnt7b-dependent pathway regulates the orientation of epithelial cell  
652 division and establishes the cortico-medullary axis of the mammalian kidney*.  
653 Development, 2009. **136**(1): p. 161-71.
- 654 37. Lindström, N.O., et al., *Conserved and Divergent Features of Mesenchymal Progenitor  
655 Cell Types within the Cortical Nephrogenic Niche of the Human and Mouse Kidney*.  
656 Journal of the American Society of Nephrology : JASN, 2018. **29**(3): p. 806-824.
- 657 38. Lindstrom, N.O., et al., *Progressive Recruitment of Mesenchymal Progenitors Reveals a  
658 Time-Dependent Process of Cell Fate Acquisition in Mouse and Human Nephrogenesis*.  
659 Dev Cell, 2018. **45**(5): p. 651-660.e4.
- 660 39. Tran, T., et al., *In Vivo Developmental Trajectories of Human Podocyte Inform In Vitro  
661 Differentiation of Pluripotent Stem Cell-Derived Podocytes*. (1878-1551 (Electronic)).
- 662 40. Golosow, N. and C. Grobstein, *Epitheliomesenchymal interaction in pancreatic  
663 morphogenesis*. Dev Biol, 1962. **4**: p. 242-55.
- 664 41. Kim, T.H., et al., *Endodermal Hedgehog signals modulate Notch pathway activity in the  
665 developing digestive tract mesenchyme*. Development, 2011. **138**(15): p. 3225-33.
- 666 42. Le Guen, L., et al., *Mesenchymal-epithelial interactions during digestive tract  
667 development and epithelial stem cell regeneration*. Cell Mol Life Sci, 2015. **72**(20): p.  
668 3883-96.
- 669 43. McCulley, D., M. Wienhold, and X. Sun, *The pulmonary mesenchyme directs lung  
670 development*. Curr Opin Genet Dev, 2015. **32**: p. 98-105.
- 671 44. Brault, V., et al., *Inactivation of the beta-catenin gene by Wnt1-Cre-mediated deletion  
672 results in dramatic brain malformation and failure of craniofacial development*.  
673 Development, 2001. **128**(8): p. 1253-64.

- 674 45. Lun, A.T., D.J. McCarthy, and J.C. Marioni, *A step-by-step workflow for low-level*  
675 *analysis of single-cell RNA-seq data with Bioconductor*. F1000Res, 2016. **5**: p. 2122.
- 676 46. Lun, A.T.L., H. Pages, and M.L. Smith, *beachmat: A Bioconductor C++ API for*  
677 *accessing high-throughput biological data from a variety of R matrix types*. PLoS  
678 Comput Biol, 2018. **14**(5): p. e1006135.
- 679 47. L. Lun, A.T., K. Bach, and J.C. Marioni, *Pooling across cells to normalize single-cell*  
680 *RNA sequencing data with many zero counts*. Genome Biology, 2016. **17**(1): p. 75.
- 681 48. Ritchie, M.E., et al., *limma powers differential expression analyses for RNA-sequencing*  
682 *and microarray studies*. Nucleic Acids Res, 2015. **43**(7): p. e47.
- 683 49. Haghverdi, L., et al., *Batch effects in single-cell RNA-sequencing data are corrected by*  
684 *matching mutual nearest neighbors*. Nat Biotechnol, 2018. **36**(5): p. 421-427.
- 685 50. Xu, C. and Z. Su, *Identification of cell types from single-cell transcriptomes using a novel*  
686 *clustering method*. Bioinformatics, 2015. **31**(12): p. 1974-1980.
- 687 51. Pons, P.L., Matthieu, *Computing Communities in Large Networks Using Random Walks*.  
688 Journal of Graph Algorithms and Applications, 2006. **10**(2): p. 191-218.
- 689 52. Finak, G., et al., *MAST: a flexible statistical framework for assessing transcriptional*  
690 *changes and characterizing heterogeneity in single-cell RNA sequencing data*. Genome  
691 Biology, 2015. **16**(1): p. 278.
- 692 53. Santos, A., et al., *Comprehensive comparison of large-scale tissue expression datasets*.  
693 PeerJ, 2015. **3**: p. e1054.
- 694 54. Sergushichev, A.A., *An algorithm for fast preranked gene set enrichment analysis using*  
695 *cumulative statistic calculation*. bioRxiv, 2016: p. 060012.
- 696 55. Nagalakshmi, V.K. and J. Yu, *The ureteric bud epithelium: morphogenesis and roles in*  
697 *metanephric kidney patterning*. Mol Reprod Dev, 2015. **82**(3): p. 151-66.
- 698 56. Bui, T.D., S. Ravi, and V. Ramavajjala, *Neural Graph Machines: Learning Neural*  
699 *Networks Using Graphs*. 2017.



- 700 57. Wolf, F.A., et al., *PAGA: graph abstraction reconciles clustering with trajectory inference*  
701 *through a topology preserving map of single cells*. *Genome Biol*, 2019. **20**(1): p. 59.  
702

703 **FIGURE LEGENDS**

704 **Graphical Abstract:** The developing interstitium is a highly heterogeneous, patterned  
705 population of cells that occupies distinct positions correlated to the adjacent  
706 parenchyma.

707

708 **Figure 1: Unexpected heterogeneity within the renal interstitium revealed through**  
709 **antibody staining and single cell RNA sequencing.** Wildtype E18.5 kidneys stained  
710 for Six2 and CK (red, blue respectively in a-m), and Foxd1 (green in a-b), Tenasin C  
711 (green in c-d), Slug (green in e-f), Acta2 (green in g-h), CDKN1c (green in i-j), Lef1  
712 (green in k-l), Tbx18 (green in m). Scale bar 100um.

713

714 **Figure 2: Interstitial heterogeneity revealed through single cell RNA sequencing:**  
715 UMAP of E18.5 mouse intersitium. For a 3-dimensional representation of the UMAP see  
716 supplemental video 1 (a).

717

718 **Figure 3: Single cell RNA sequencing reveals unexpected cortical heterogeneity**  
719 **within the renal interstitium that is validated through mRNA in situ hybridization.**

720 Specific gene expression displayed as a UMAP (a, c, e, g, i) for Foxd1(a), Netrin (c),  
721 Fibin (e), Smoc2 (g) and Dlk1 (i). E18.5 *in situ* hybridization of Foxd1, expressed in  
722 clusters 1-3 (b), Netrin1, expressed in clusters 1, 3 (d), Fibin expressed in clusters 2-3  
723 (f), Smoc2, expressed in clusters 1 (h) and Dlk1, expressed in cluster 1 (j) reveals  
724 cortical heterogeneity. Scale bar: 100um

725

726 **Figure 4: Spatial characterization of scRNA seq-clusters reveals cortico-**  
727 **medullary patterning among interstitial subtypes.** Specific gene expression  
728 displayed as a UMAP (a, c, e, g, i, k) for Foxd1 (a), Lox (c), Clca3a1 (e), Smoc2 (g),  
729 Penk (i), and Wnt4 (k). E18.5 *in situ* hybridization of Foxd1: clusters 1-3 interstitial  
730 expression indicated with arrow, epithelial lineage expression in podocytes indicated  
731 with asterisk) (b-b') , Lox: cluster 7 (d-d'), Clca3a1: clusters 6-8 (f-f'), Smoc2: cluster 9  
732 (h-h'), Penk: cluster 9-12 (j-j'), Wnt4: cluster 11-12 (interstitial expression indicated with  
733 arrow, epithelial lineage expression in PTA indicated with asterisk) (l-l'), reveals a  
734 molecular pattern which spans the cortico-medullary axis. b, d, f, h, j, l Scale bar:  
735 500um. b', d', f', h', j', l' Scale bar: 100um.

736

737 **Figure 5: Mesangium and pericyte populations detected using single cell RNA**  
738 **sequencing.** mRNA *in situ* hybridization of Dlk1 expression in clusters 15-16 (a) and  
739 Akr1b7 expression in cluster 14 (c). Dotted line outlines the glomerulus. Scale  
740 bar:100um Specific gene expression displayed as a tSNE (b, d) for Dlk1 (b) and Akr1b7  
741 (d).

742

743 **Figure 6: Foxd1 expressing cells may contain multiple, lineage-restricted**  
744 **progenitor cells.** Differentiation roots identified by simulation of a Markov process with  
745 velocity-based transition probabilities in the reverse direction (a). Diffusion map of  
746 interstitial cells demonstrating dispersion of identified cell types along multiple distinct  
747 trajectories (b). For 3-dimensional representation of the diffusion map see supplemental  
748 video 3. The root cell is indicated by a diamond.

749

750 **Figure 7: Distinct clusters show unique transcriptional activity.** Heat map showing  
751 each cell organized by interstitial cluster (abscissa) and binarized regulon activity  
752 (ordinate) where black indicates an active regulon, while white indicates an inactive  
753 regulon.

754

755 **Figure 8: Perturbed patterning of the interstitial zones disrupts nephron**  
756 **differentiation.** The Lef1 regulon is most active in clusters 9-12 (a). mRNA *in situ*  
757 hybridization (b, e, f, h, k, l) or immunofluorescence staining (c, d, g, i, j, m) of E18.5  
758 wildtype (b-g) and Foxd1Cre;Beta-Catenin<sup>o/-</sup> mutant (h-m) kidneys with probes to  
759 regional interstitial markers Foxd1(b, h), LOX (e, k) and TGFB1i1 (f, l) or antibodies to  
760 interstitial marker Meis1/2/3 (green in c, i) and Slug (green in d and j), nephron  
761 progenitor marker Six2 (red in c, d, i, j), collecting duct marker CK (white in c, d, i, j) or  
762 loop of Henle marker THP (green in g, m), and proximal tubule marker LTL (red in g, m).  
763

764 **Figure 9: Human fetal renal interstitial heterogeneity revealed through single cell**  
765 **RNA sequencing:** UMAP of 17 week fetal human renal interstitium. For a 3-dimensional  
766 representation of the UMAP see supplemental video 4 (a). UMAP of cluster  
767 assignments from E18.5 mouse interstitial cells mapped onto the 17-week human  
768 interstitial cells (b).

769

770 **Supplemental Table 1:** List of top 50 differentially expressed genes (DEGs) in each  
771 cluster when compared to all clusters. Our annotations for each cluster as described in

772 the text are as follows: Cortical Interstitium: Clusters 1-3; Nephrogenic Interstitium:  
773 Clusters 4-5; Proximal Tubule Interstitium: Clusters 6-8; Interstitium Medullary to  
774 Proximal Tubule (Outer Medulla): Cluster 9; Outer strip of inner medulla Interstitium:  
775 Cluster 10; Papillary Interstitium: Clusters 10-12; Ureteric Interstitium: Cluster 13;  
776 Vascular Smooth Muscle: Cluster 14; Pericyte: Cluster 15; Mesangium: Cluster 16;  
777 Indeterminate Signature: Cluster 17.

778

779 **Supplemental Table 2:** List of stromal gene against which mRNA in situ hybridizations  
780 were conducted, the image of the in situ, along with the rank of the gene in the DEG list  
781 for each cluster. Yellow indicates the gene was ranked in the top 100 DEGs, while grey  
782 indicates the gene was not present in the DEG list for that specific cluster.

783

784 **Supplemental Figure 1:** tSNE of renal interstitium. For a 3-dimensional representation of the  
785 tSNE see supplemental video 2 (a). Specific gene expression displayed as a tSNE (b-j) for  
786 Akr1b7 (b), Dlk1 (c), Foxd1 (d), Ntn1 (e), Fibin (f), Smoc2 (g), Lox (h), Penk (i) and Wnt4 (j)

787

788 **Supplemental Figure 2:** Normalized enrichment scores (NES) for mesangial, pericyte  
789 and vascular smooth muscle cell types specifically for clusters 14, 15 and 16.

790

791 **Supplemental Figure 3:** UMAP with cells colored by abundance of Lef1 (a) or Smoc2  
792 (c) unspliced transcripts. UMAP with cells colored by abundance of Lef1 (b) or Smoc2  
793 (d) spliced transcripts. RNA velocity field visualized using Gaussian smoothing on a  
794 regular grid (e). Diffusion map of stoma cells colored by diffusion pseudotime (f).

795

796 **Supplemental Video 1:** 3-dimensional view of mouse renal interstitial UMAP

797

798 **Supplemental Video 2:** 3-dimensional view of mouse renal interstitial tSNE

799

800 **Supplemental Video 3:** 3-dimensional view of mouse renal interstitial diffusion map

801

802 **Supplemental Video 4:** 3-dimernasional view of fetal human renal interstitial UMAP.

803

## Graphical Abstract

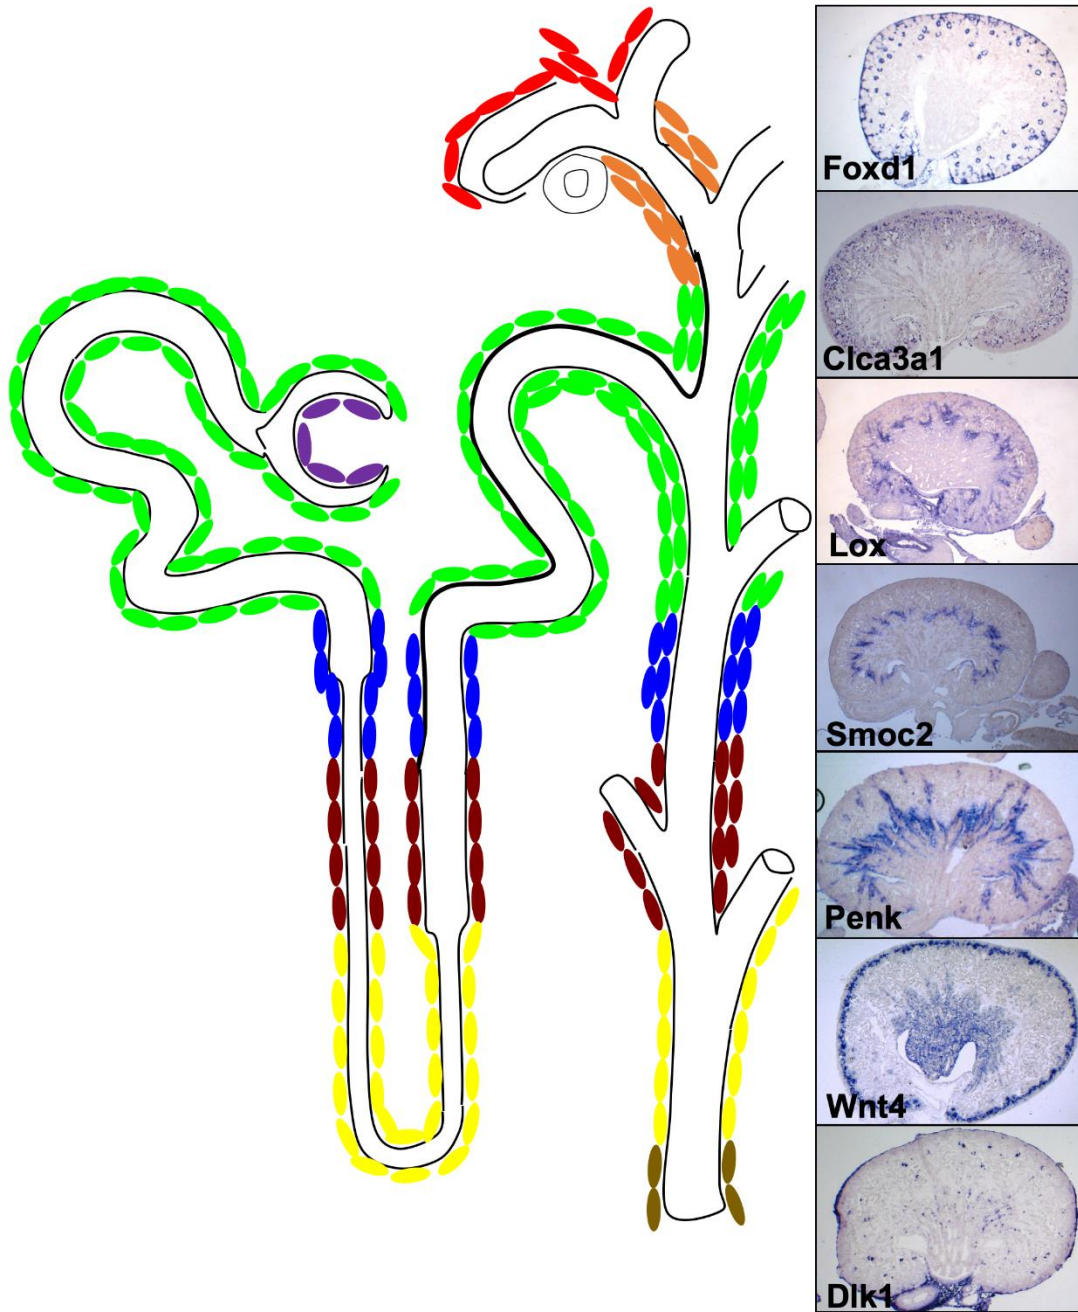

804

805

**Graphical Abstract:** The developing interstitium is a highly heterogeneous, patterned population of

806

cells that occupies distinct positions correlated to the adjacent parenchyma.

807

**Figure 1**

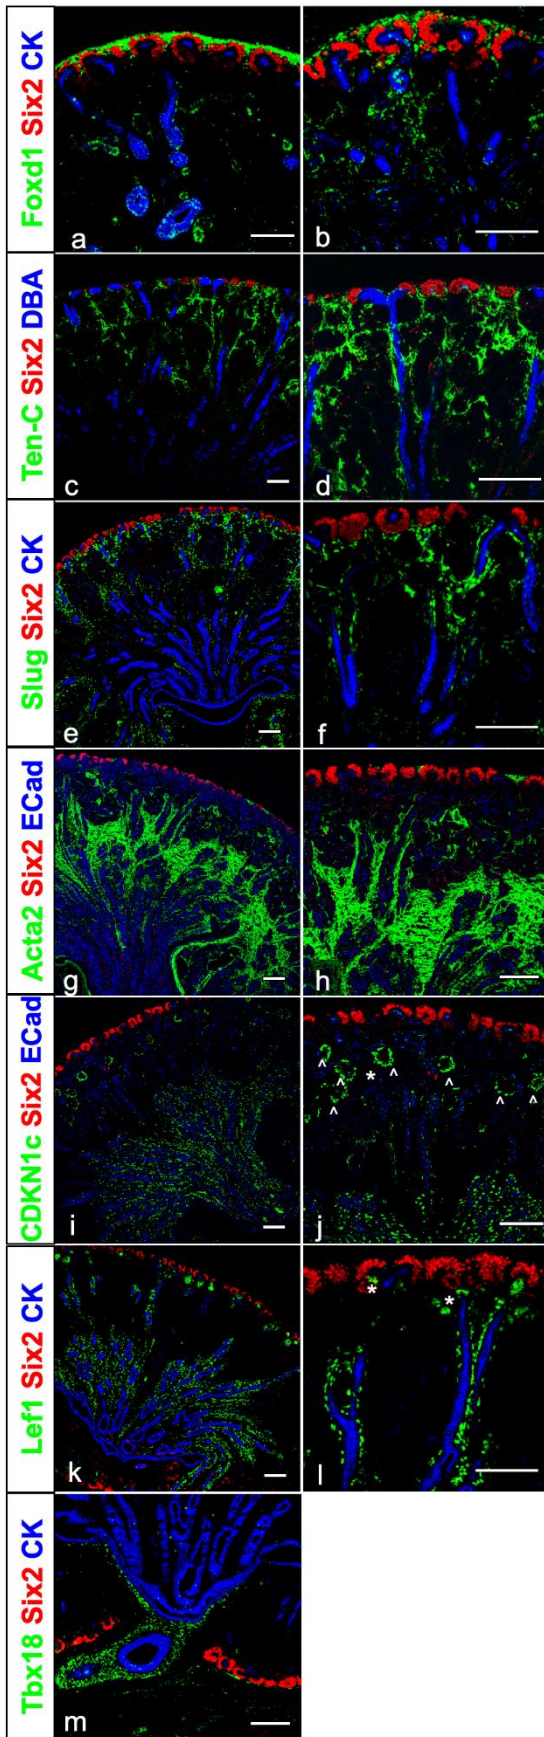

**Figure 1: Unexpected heterogeneity within the renal interstitium revealed through antibody staining and single cell RNA sequencing.** Wildtype E18.5 kidneys stained for Six2 and CK (red, blue respectively in a-m), and Foxd1 (green in a-b), Tenasin C (green in c-d), Slug (green in e-f), Acta2 (green in g-h), CDKN1c (green in i-j), Lef1 (green in k-l), Tbx18 (green in m). Scale bar 100um.



## Figure 2

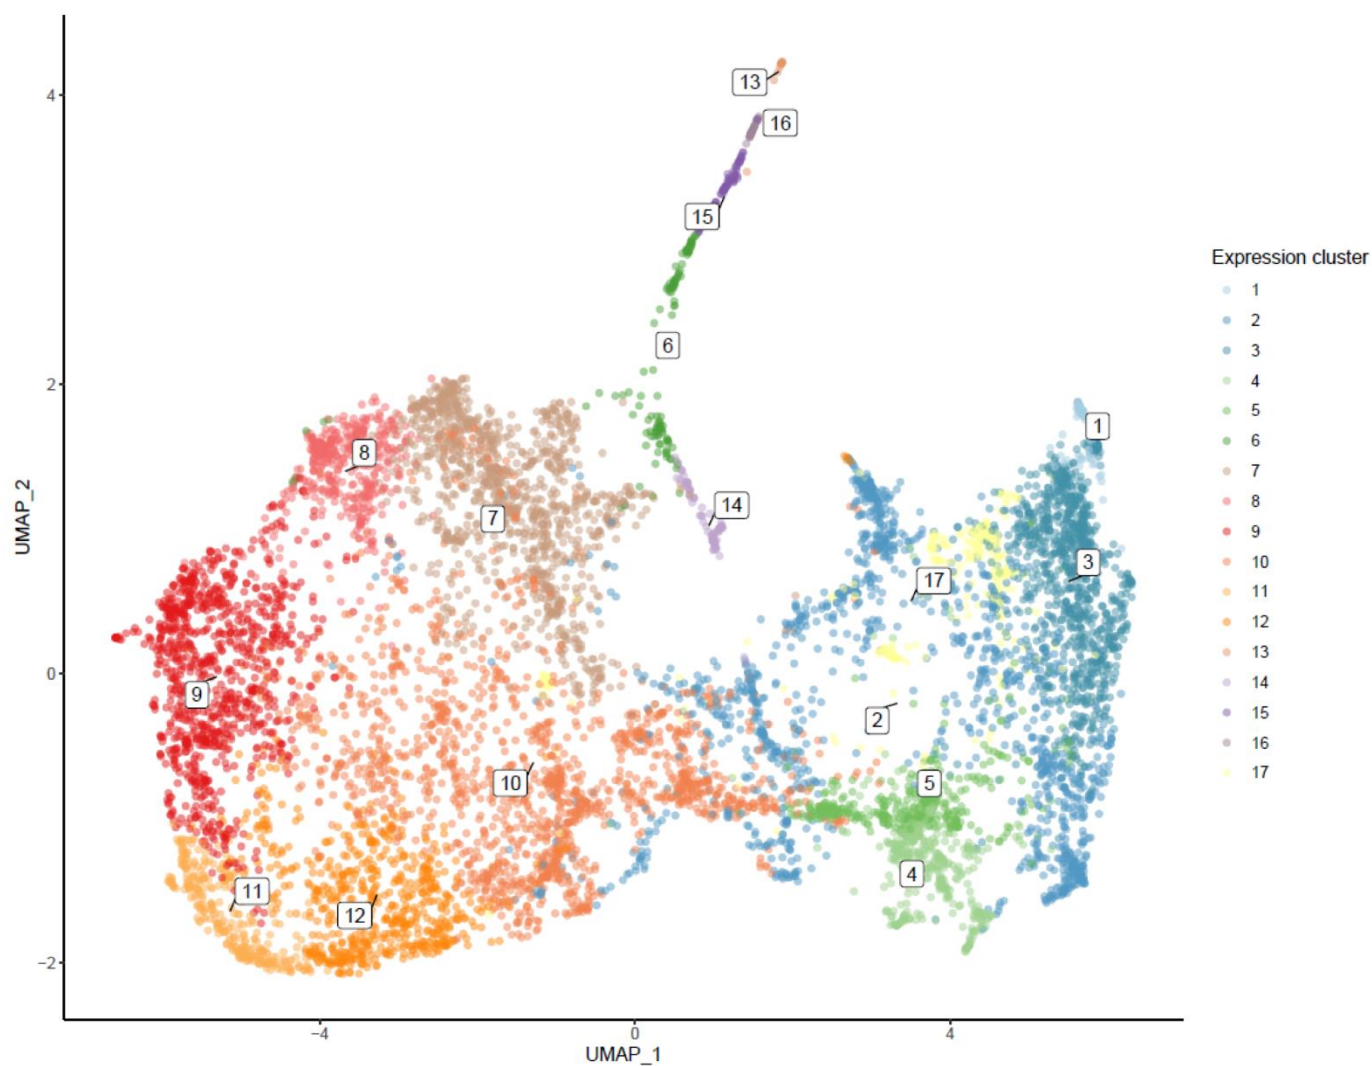

809

810

**Figure 2: Interstitial heterogeneity revealed through single cell RNA sequencing: UMAP of**

811

E18.5 mouse intersitium. For a 3-dimensional representation of the UMAP see supplemental video 1

812

(a).

813

814

## Figure 3

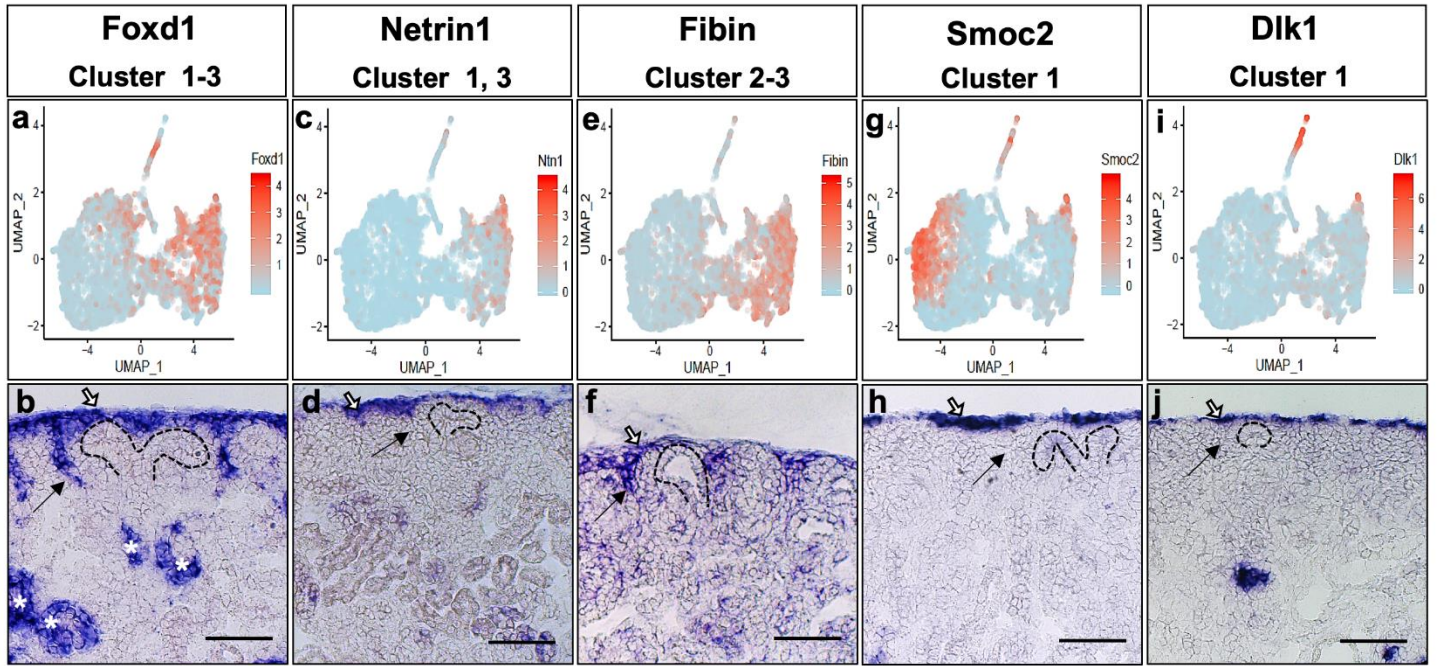

**Figure 3: Single cell RNA sequencing reveals unexpected cortical heterogeneity within the**

**renal interstitium that is validated through mRNA in situ hybridization.** Specific gene expression displayed as a UMAP (a, c, e, g, i) for Foxd1(a), Netrin (c), Fibin (e), Smoc2 (g) and Dlk1 (i). E18.5 *in situ* hybridization of Foxd1, expressed in clusters 1-3 (b), Netrin1, expressed in clusters 1, 3 (d), Fibin expressed in clusters 2-3 (f), Smoc2, expressed in clusters 1 (h) and Dlk1, expressed in cluster 1 (j) reveals cortical heterogeneity. Scale bar: 100um

## Figure 4

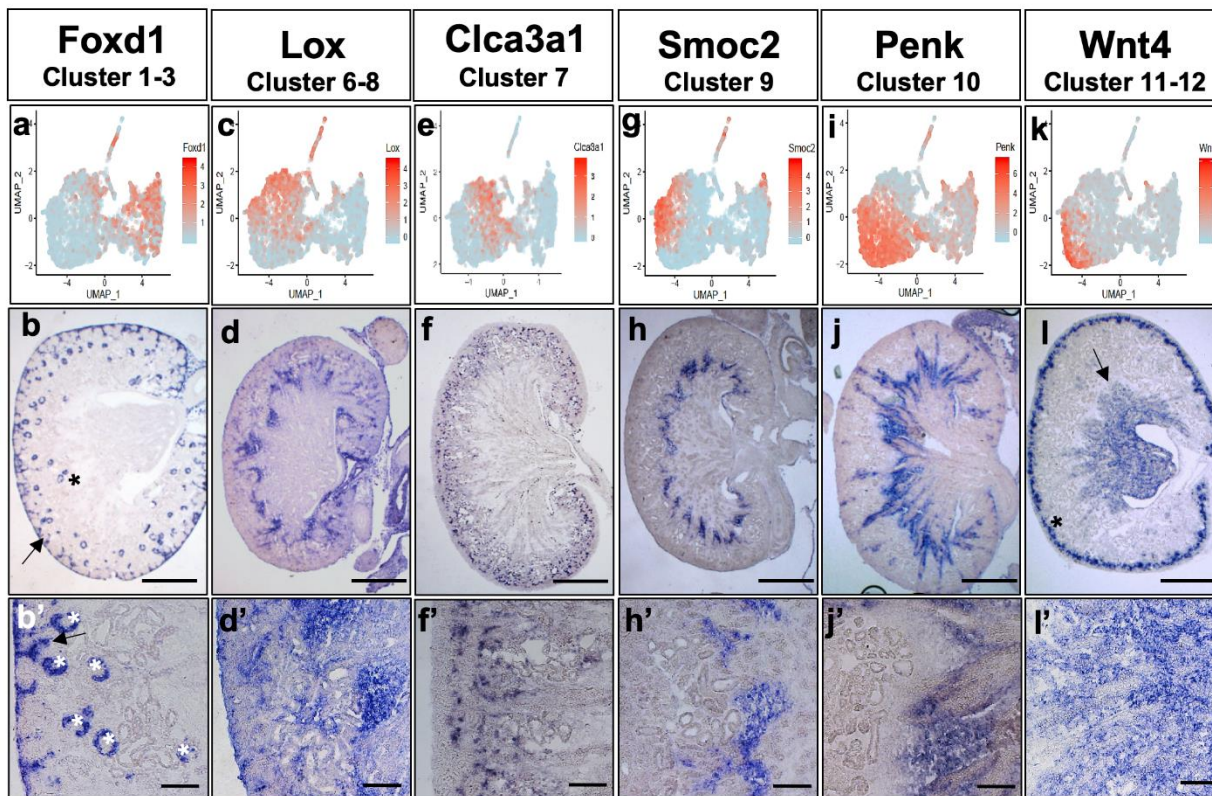

**Figure 4: Spatial characterization of scRNA seq-clusters reveals cortico-medullary patterning**

**among interstitial subtypes.** Specific gene expression displayed as a UMAP (a, c, e, g, i, k) for Foxd1 (a), Lox (c), Clca3a1 (e), Smoc2 (g), Penk (i), and Wnt4 (k). E18.5 *in situ* hybridization of Foxd1: clusters 1-3 interstitial expression indicated with arrow, epithelial lineage expression in podocytes indicated with asterisk) (b-b') , Lox: cluster 7 (d-d'), Clca3a1: clusters 6-8 (f-f'), Smoc2: cluster 9 (h-h'), Penk: cluster 9-12 (j-j'), Wnt4: cluster 11-12 (interstitial expression indicated with arrow, epithelial lineage expression in PTA indicated with asterisk) (l-l'), reveals a molecular pattern which spans the cortico-medullary axis. b, d, f, h, j, l Scale bar: 500um. b', d', f', h', j', l' Scale bar: 100um.

## Figure 5

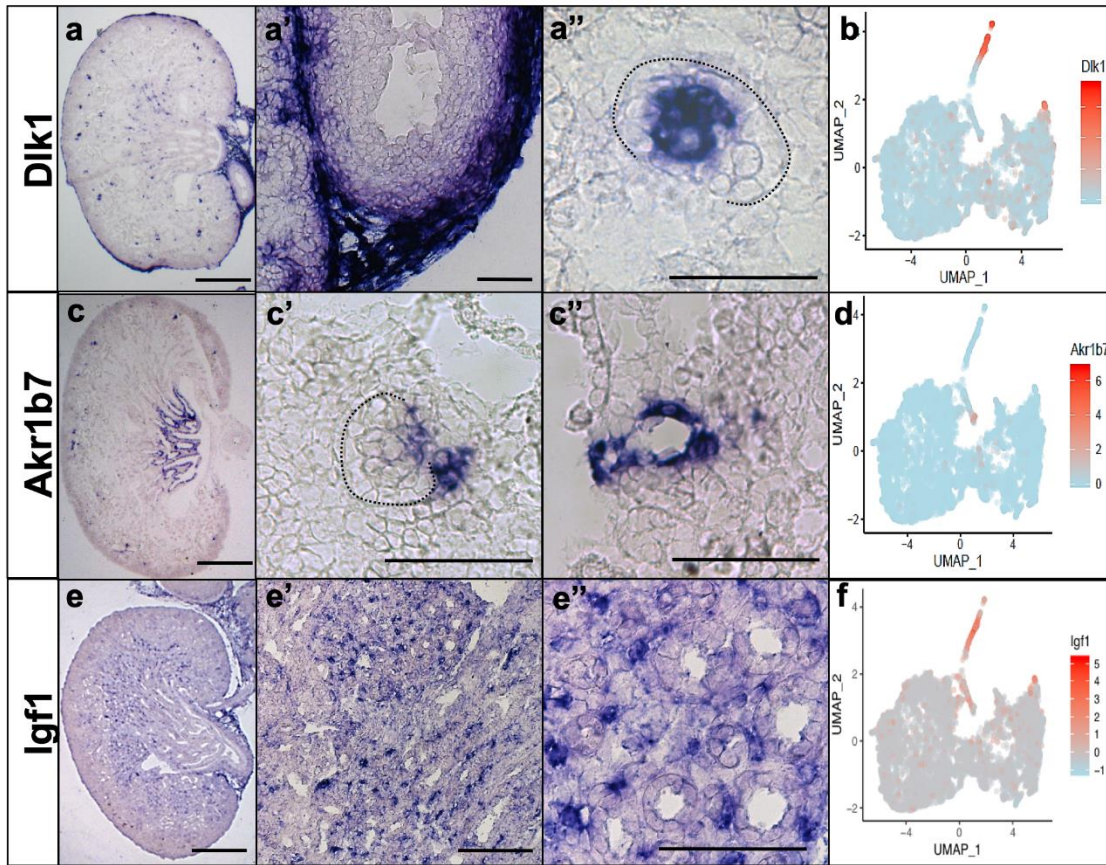

**Figure 5: Mesangium and pericyte populations detected using single cell RNA sequencing.**

mRNA *in situ* hybridization of *Dlk1* expression in clusters 15-16 (a) and *Akr1b7* expression in cluster 14 (c). Dotted line outlines the glomerulus. Scale bar:100um Specific gene expression displayed as a tSNE (b, d) for *Dlk1* (b) and *Akr1b7* (d).

**Figure 6**

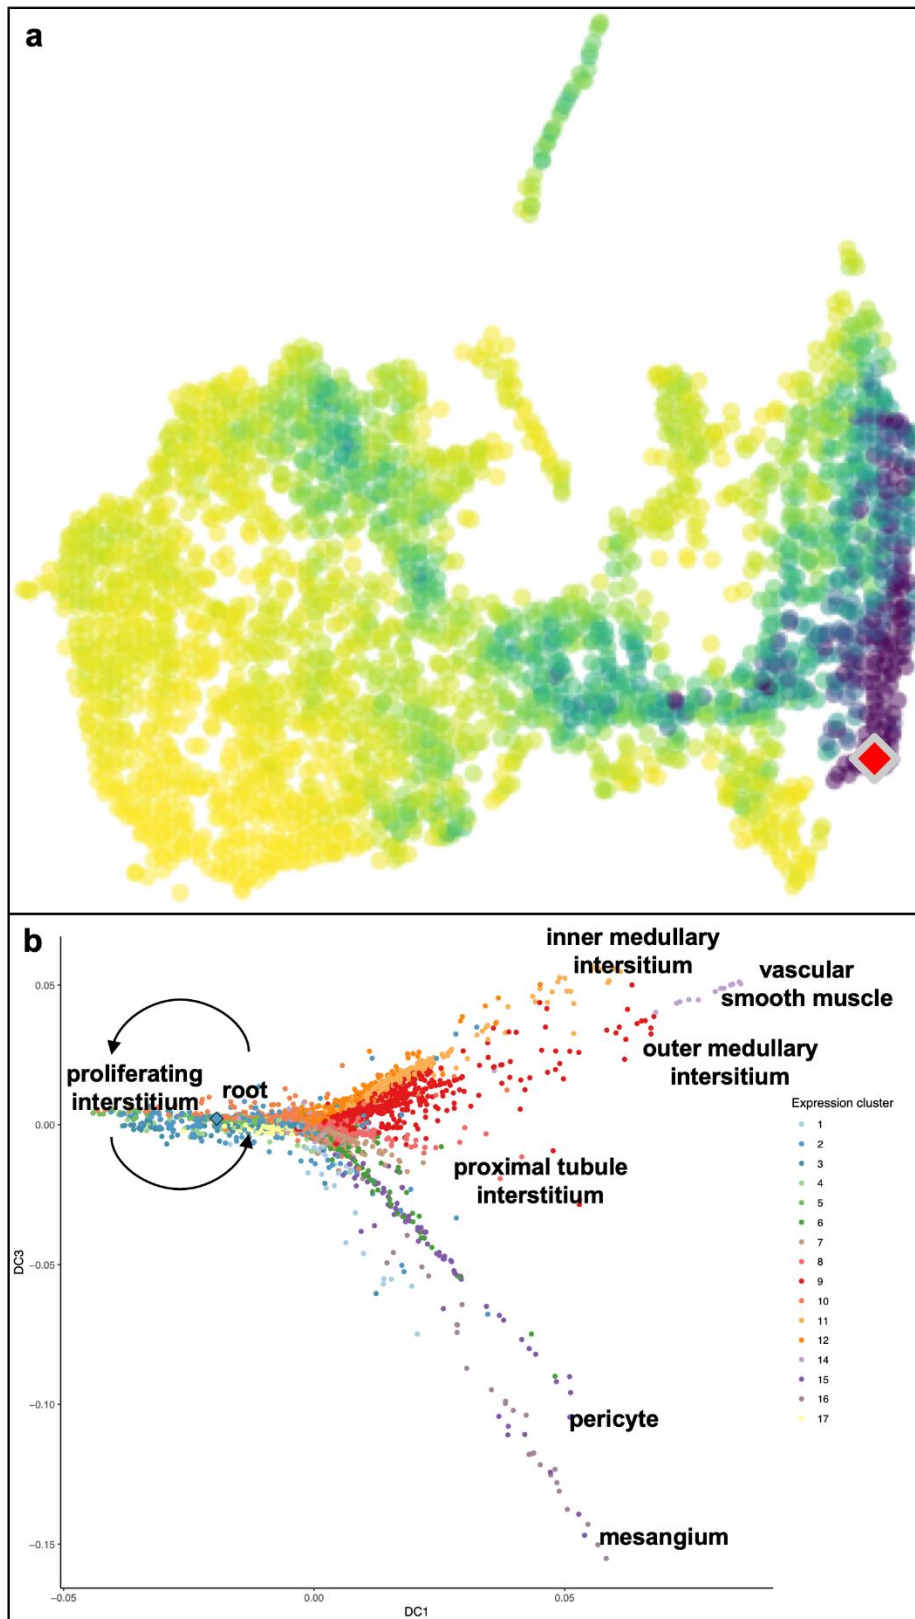

**Figure 6: Foxd1 expressing cells may contain multiple, lineage-restricted progenitor cells.** Differentiation roots identified by simulation of a Markov process with velocity-based transition probabilities in the reverse direction (a). Diffusion map of interstitial cells demonstrating dispersion of identified cell types along multiple distinct trajectories (b). For 3-dimensional representation of the diffusion map see supplemental video 3. The root cell is indicated by a diamond.

## Figure 7

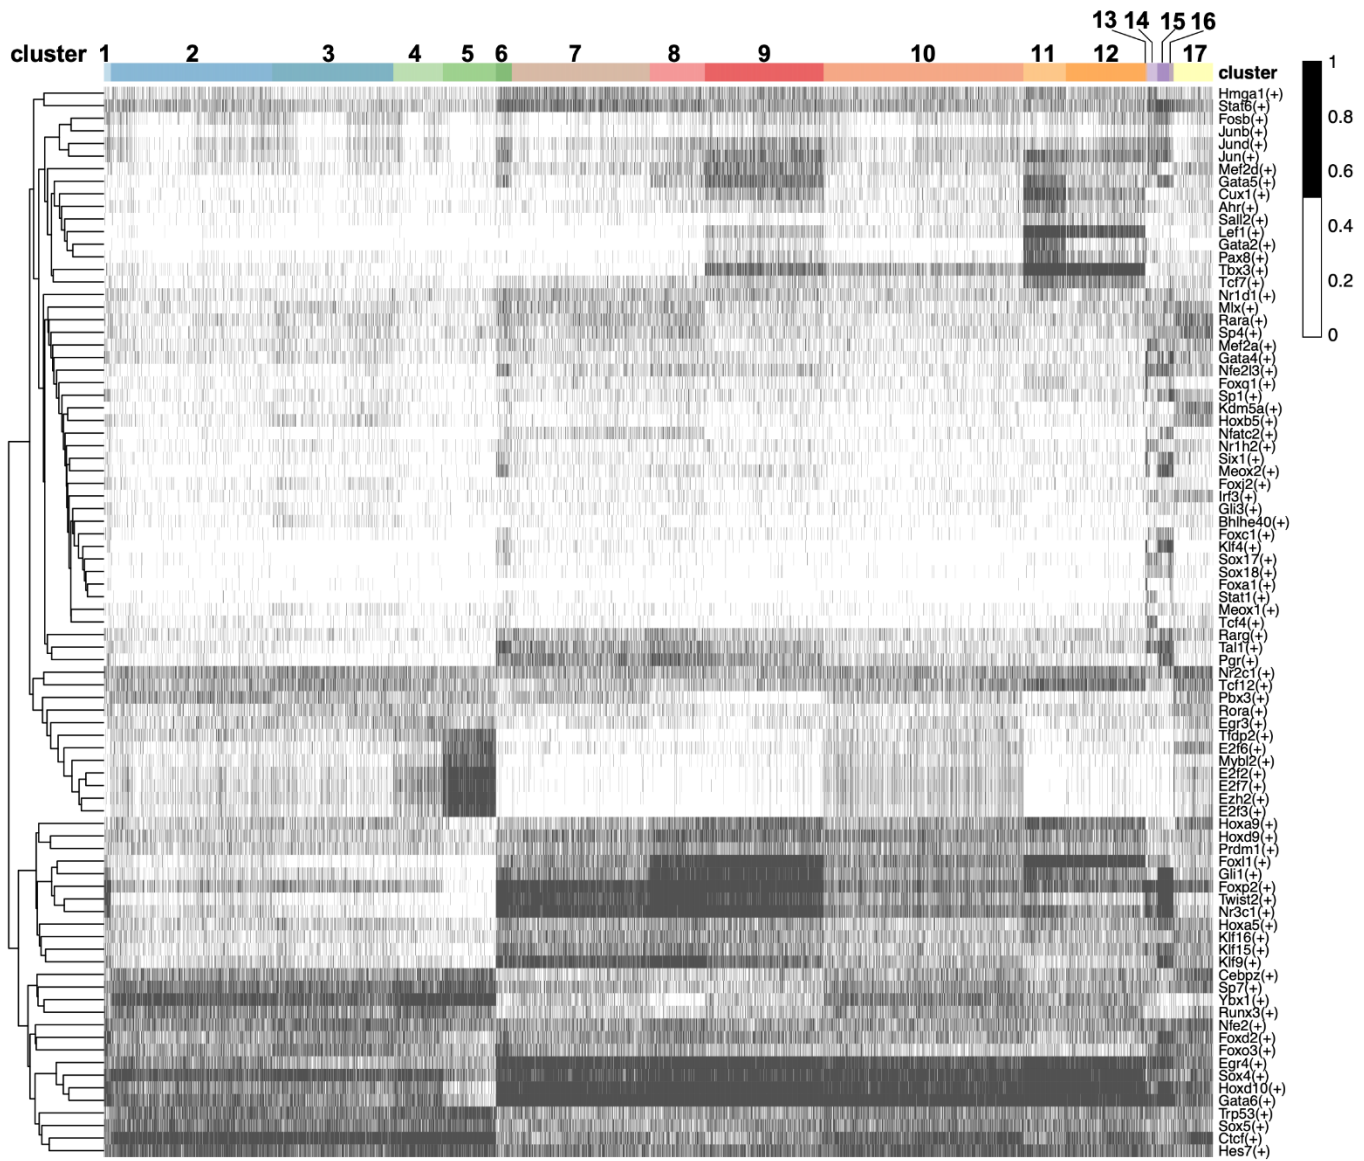

844  
845 **Figure 7: Distinct clusters show unique transcriptional activity.** Heat map showing each cell  
846 organized by interstitial cluster (abscissa) and binarized regulon activity (ordinate) where black  
847 indicates an active regulon, while white indicates an inactive regulon.

848

849

## Figure 8

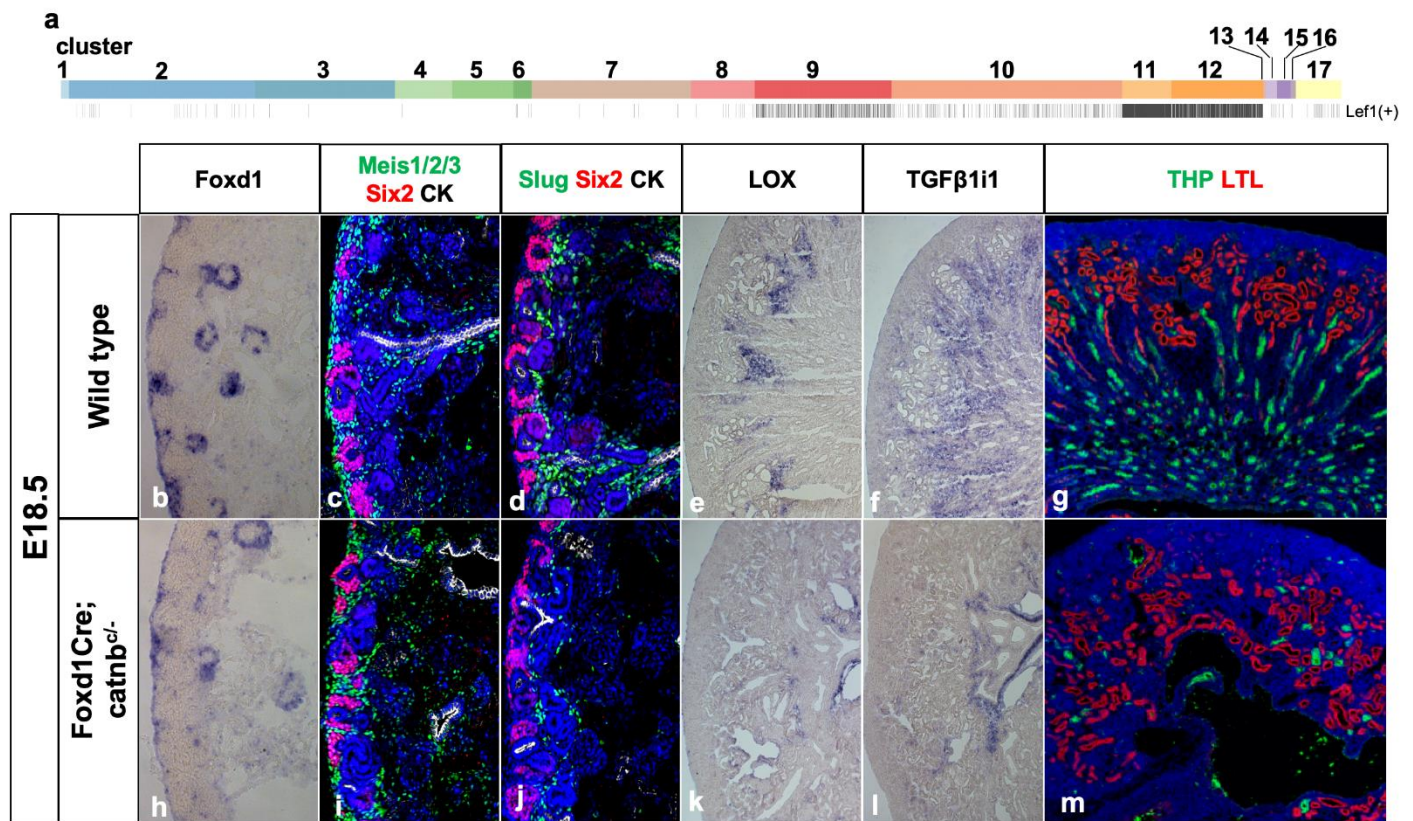

**Figure 8: Perturbed patterning of the interstitial zones disrupts nephron differentiation.** The

Lef1 regulon is most active in clusters 9-12 (a). mRNA *in situ* hybridization (b, e, f, h, k, l) or immunofluorescence staining (c, d, g, i, j, m) of E18.5 wildtype (b-g) and Foxd1Cre;Beta-Catenin<sup>c/-</sup> mutant (h-m) kidneys with probes to regional interstitial markers Foxd1(b, h), LOX (e, k) and TGFβ1i1 (f, l) or antibodies to interstitial marker Meis1/2/3 (green in c, i) and Slug (green in d and j), nephron progenitor marker Six2 (red in c, d, i, j), collecting duct marker CK (white in c, d, i, j) or loop of Henle marker THP (green in g, m), and proximal tubule marker LTL (red in g, m).

**Figure 9**

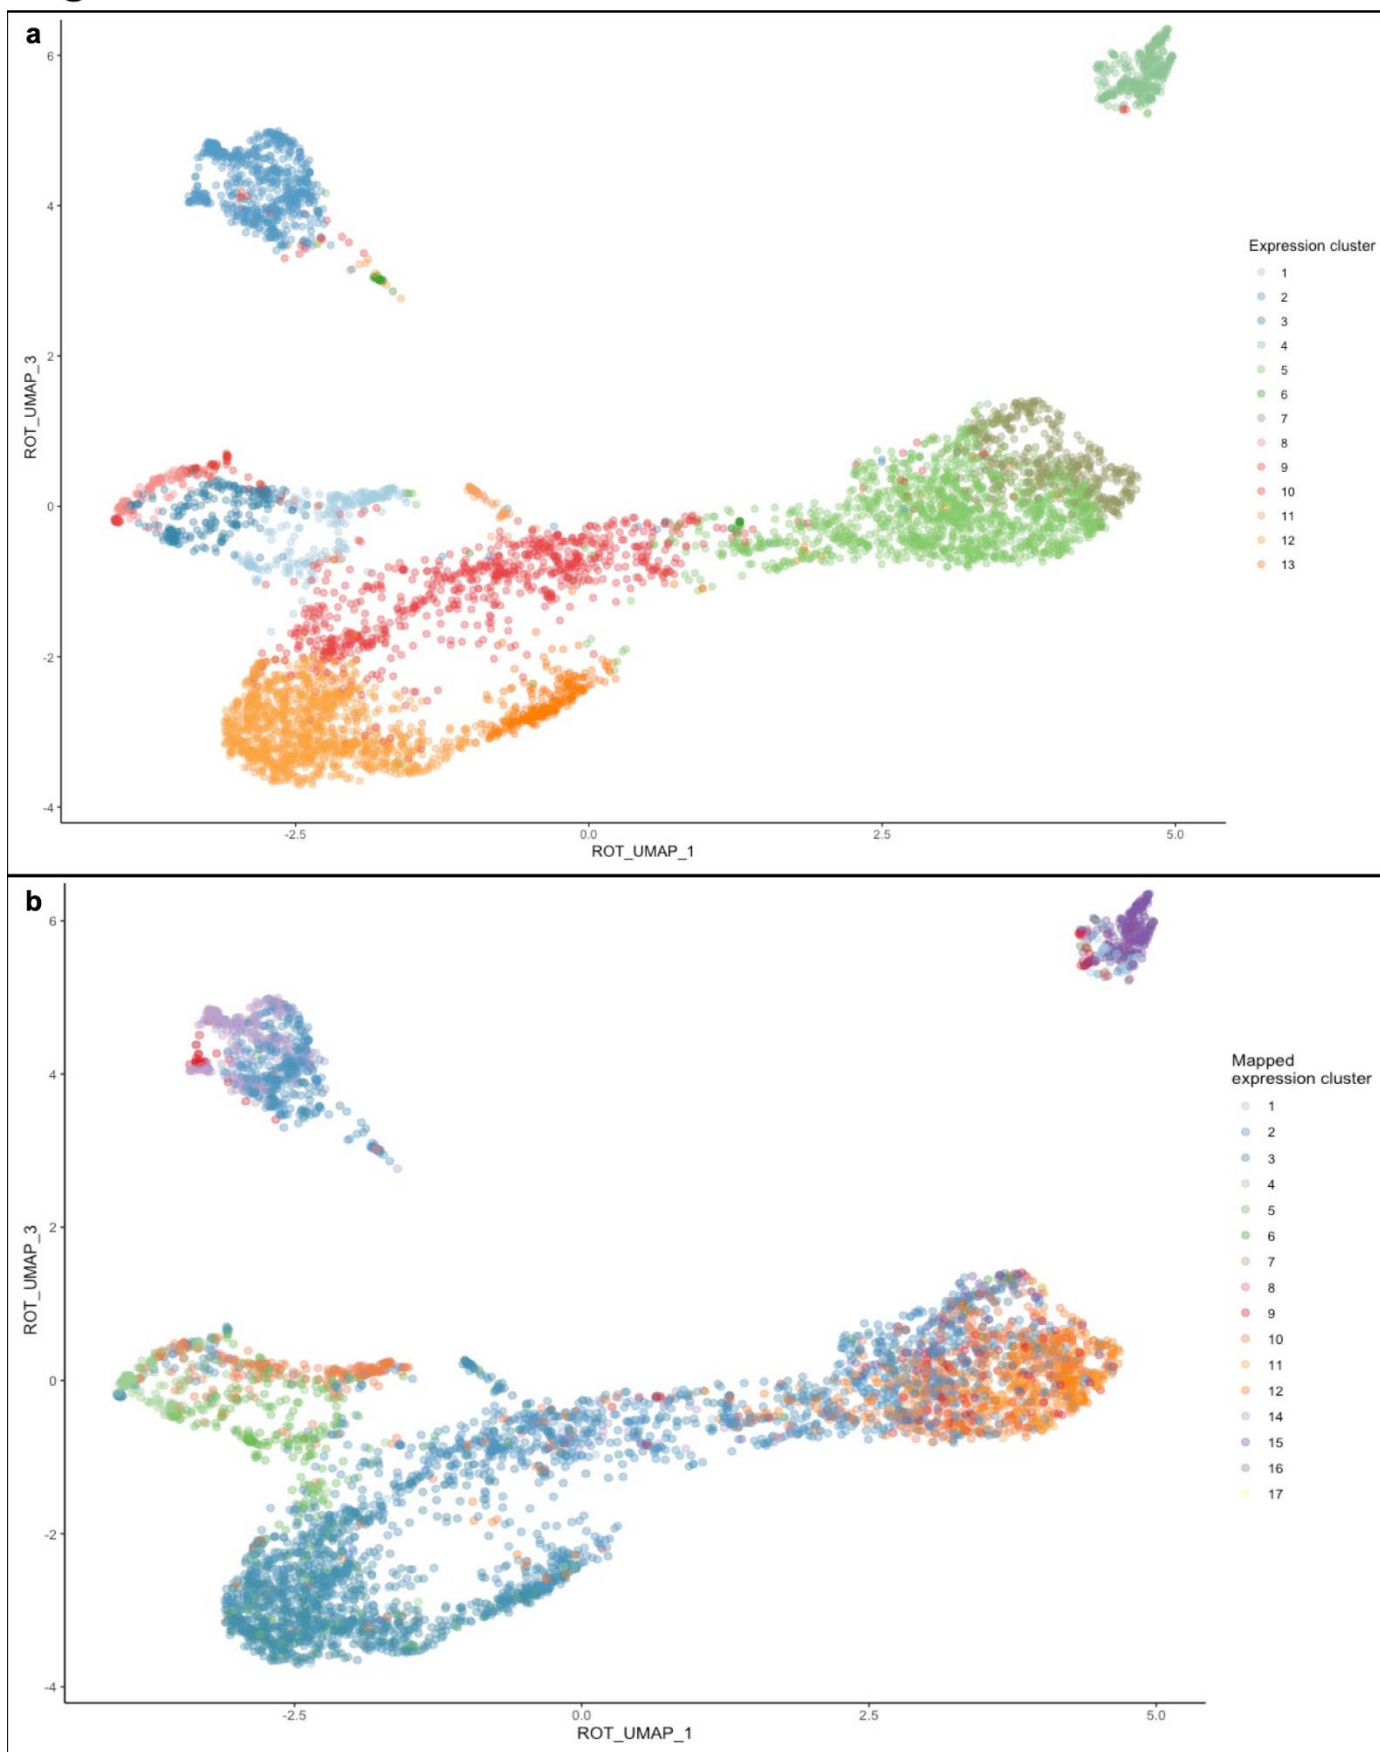



861 **Figure 9: Human fetal renal interstitial heterogeneity revealed through single cell RNA**  
862 **sequencing:** UMAP of 17 week fetal human renal interstitium. For a 3-dimensional representation of  
863 the UMAP see supplemental video 4 (a). UMAP of cluster assignments from E18.5 mouse interstitial  
864 cells mapped onto the 17-week human interstitial cells (b).

865

866

## Supplemental Figure 1

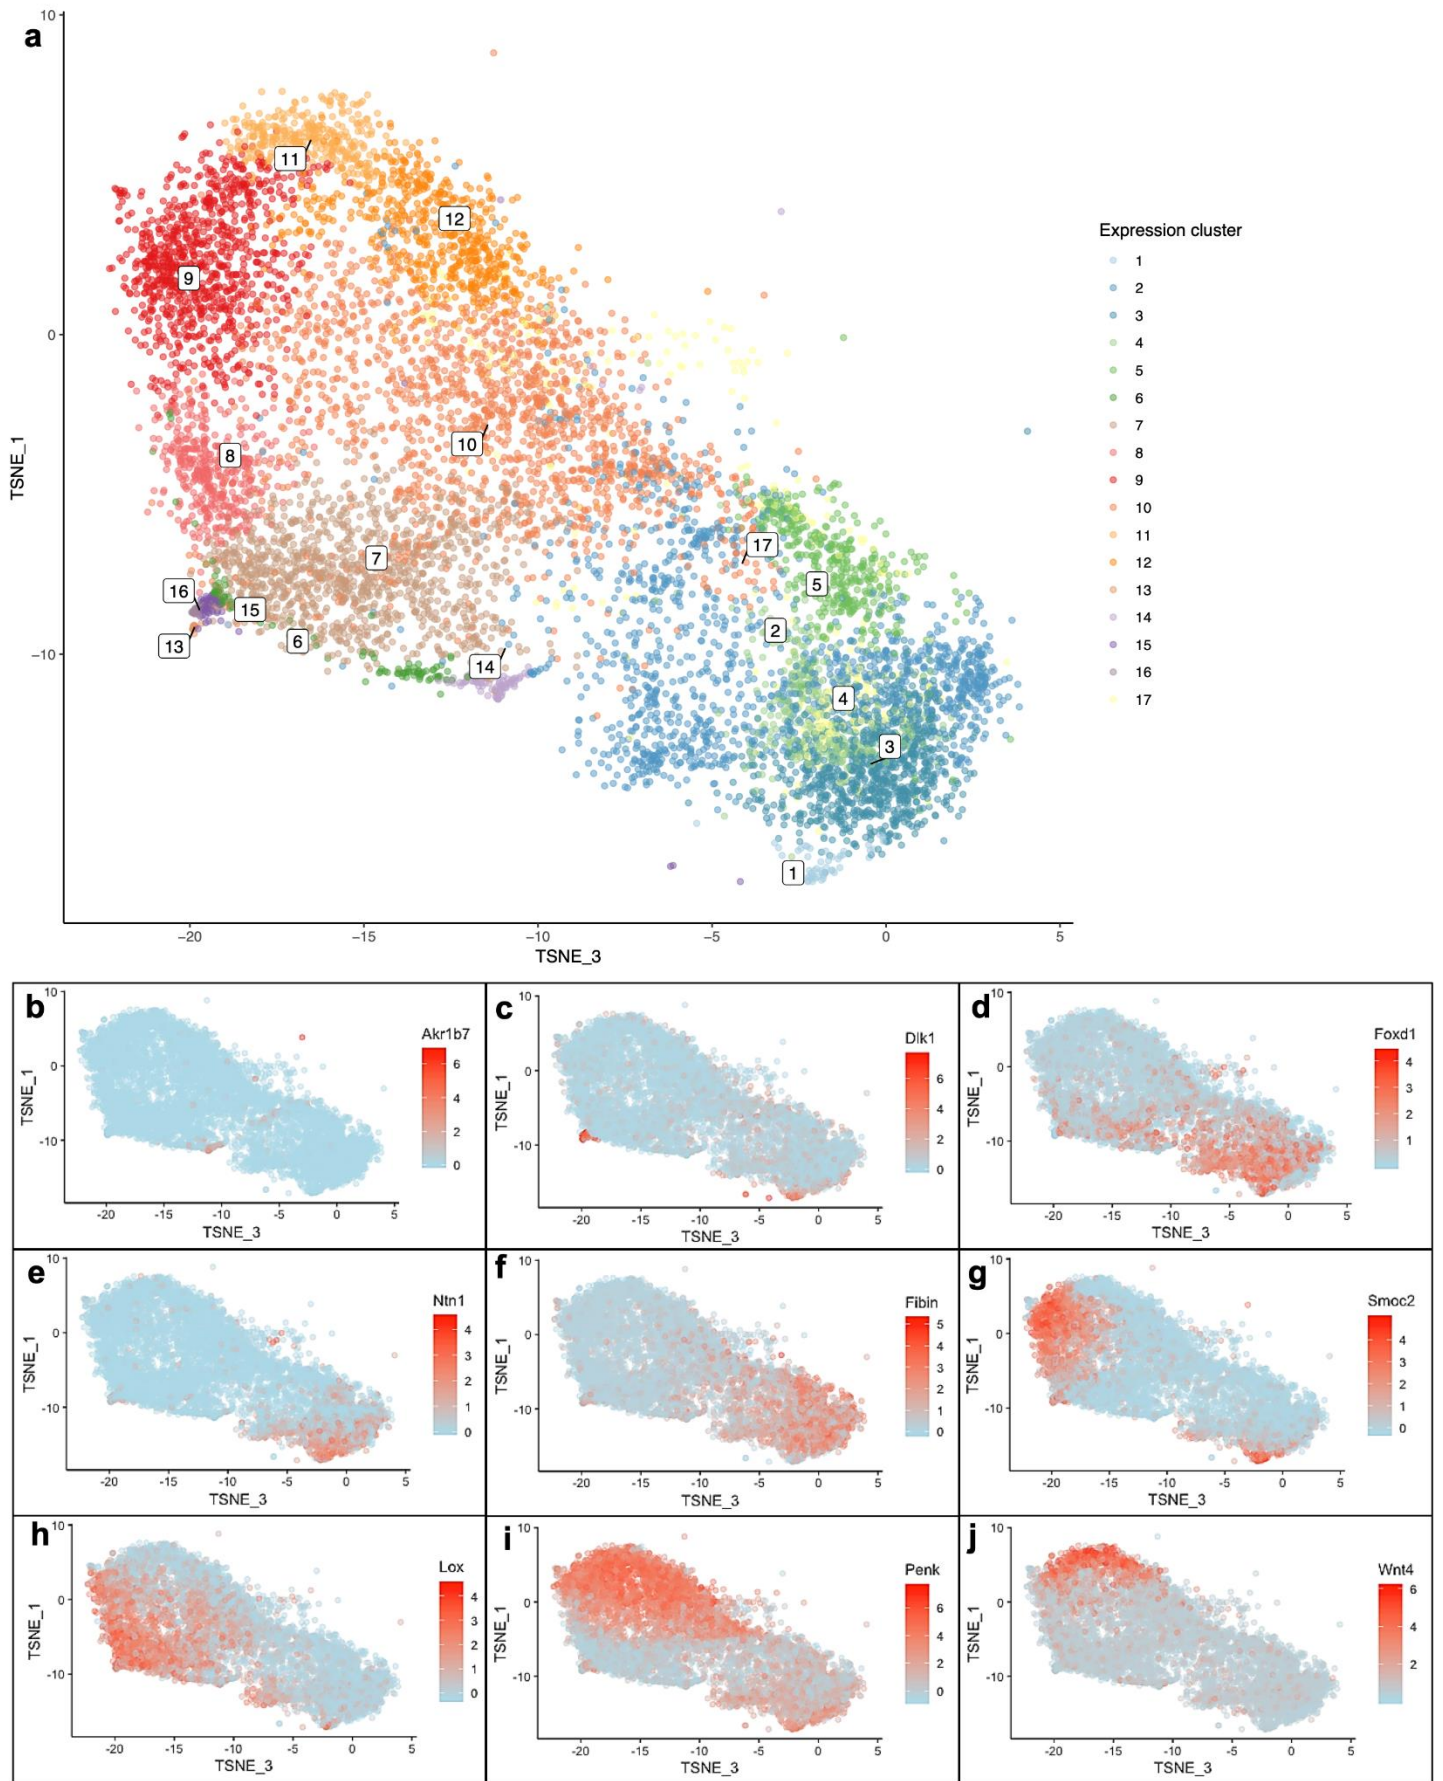

868 **Supplemental Figure 1:** tSNE of renal interstitium. For a 3-dimensional representation of the tSNE see  
869 supplemental video 2 (a). Specific gene expression displayed as a tSNE (b-j) for Akrl1b7 (b), Dlk1 (c), Foxd1  
870 (d), Ntn1 (e), Fibin (f), Smoc2 (g), Lox (h), Penk (i) and Wnt4 (j)

871

872

## Supplemental Figure 2

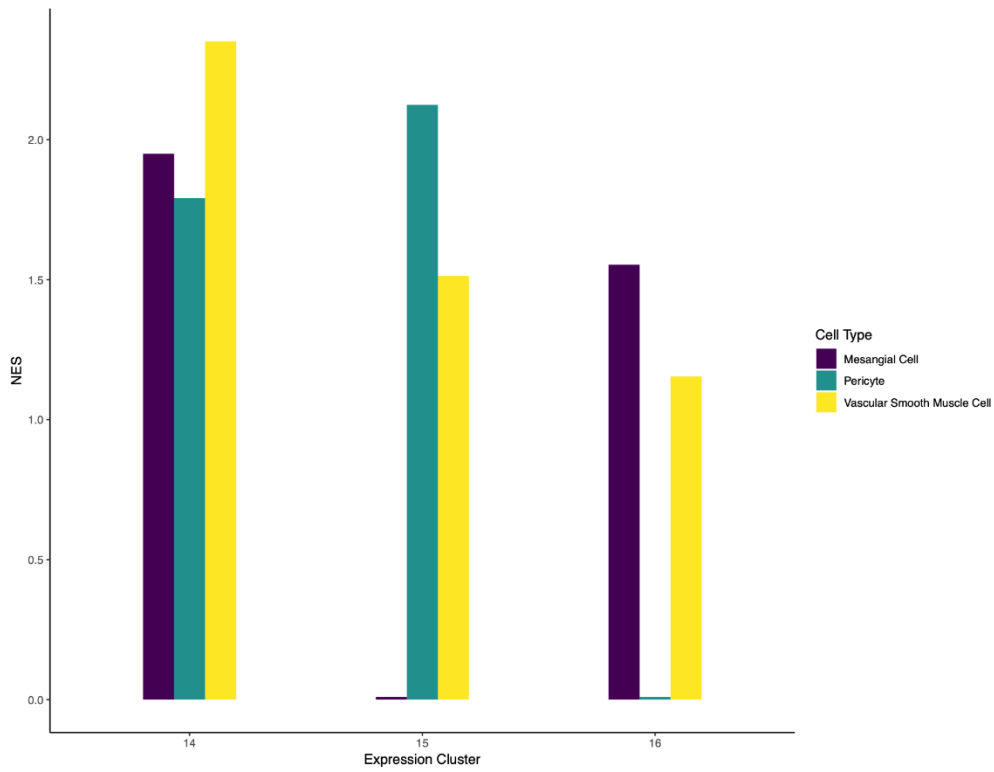

873

874

**Supplemental Figure 2:** Normalized enrichment scores (NES) for mesangial, pericyte and vascular

875

smooth muscle cell types specifically for clusters 14, 15 and 16.

876

## Supplemental Figure 3

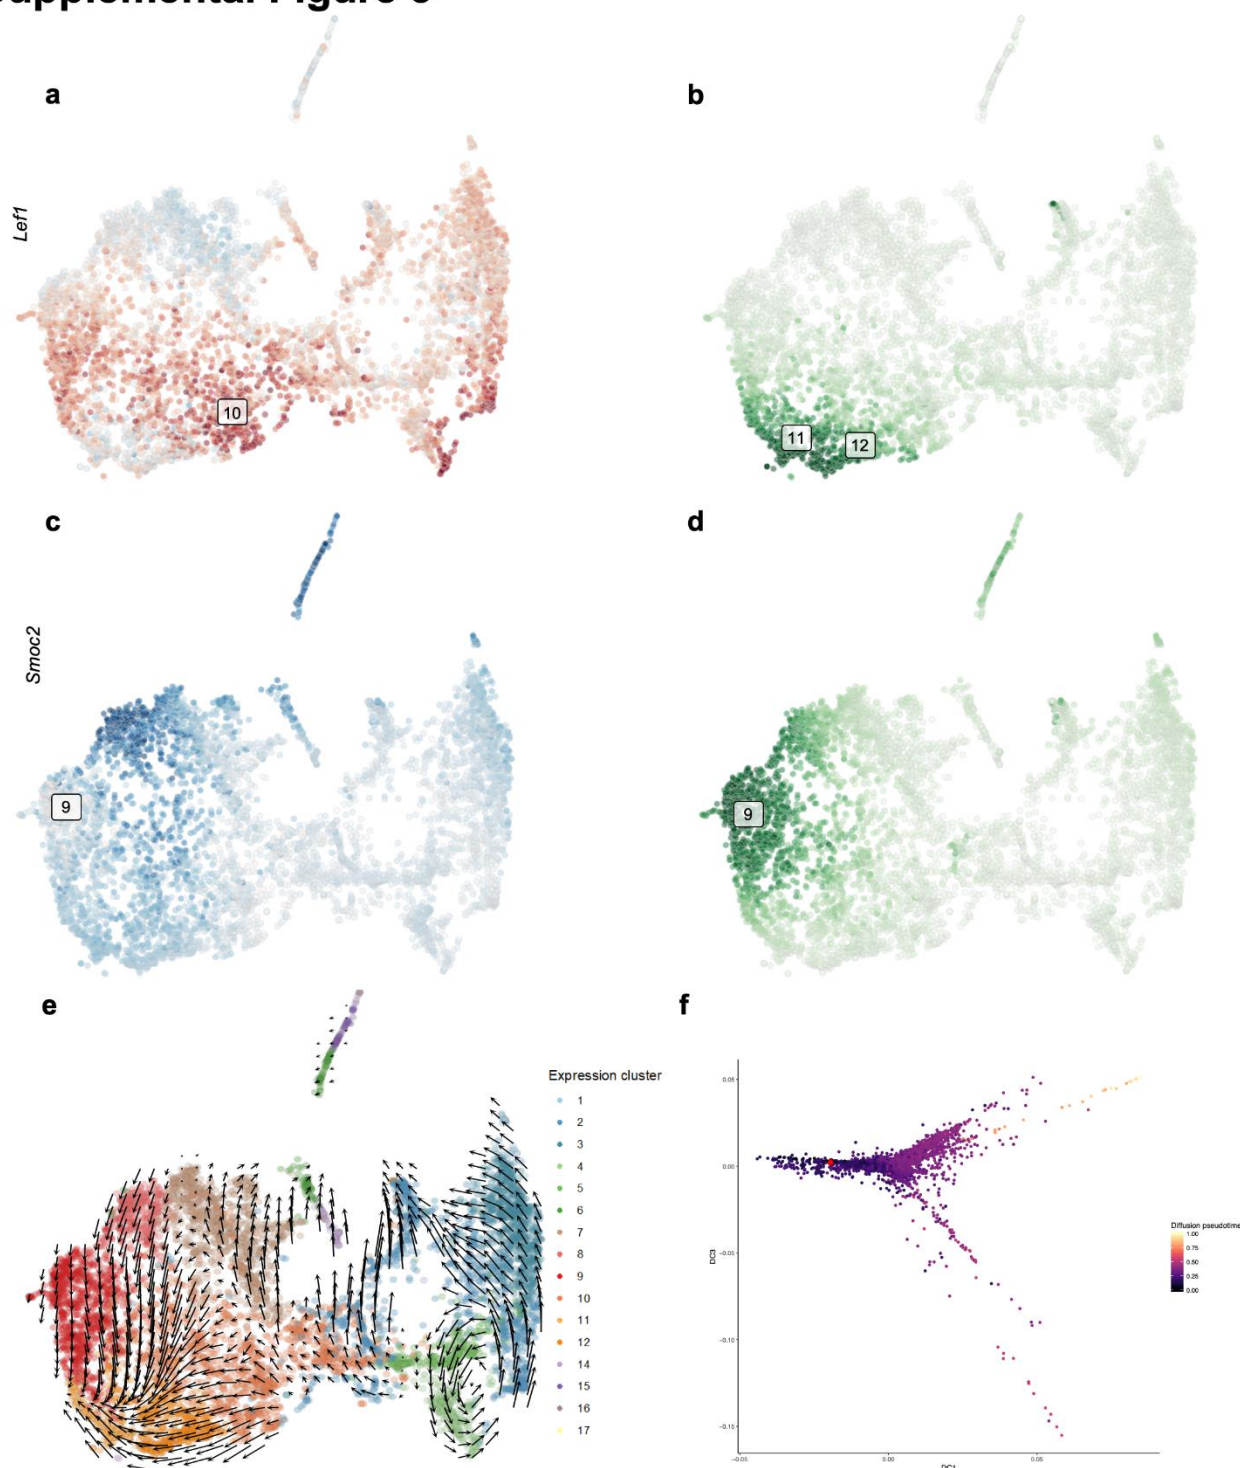

877

878

879

**Supplemental Figure 3:** UMAP with cells colored by abundance of Lef1 (a) or Smoc2 (c) unspliced transcripts. UMAP with cells colored by abundance of Lef1 (b) or Smoc2 (d) spliced transcripts. RNA

880 velocity field visualized using Gaussian smoothing on a regular grid (e). Diffusion map of stoma cells  
881 colored by diffusion pseudotime (f).

|    | Cluster 1 | Cluster 2 | Cluster 3 | Cluster 4 | Cluster 5 | Cluster 6 | Cluster 7 | Cluster 8 | Cluster 9 | Cluster 10 | Cluster 11 | Cluster 12 | Cluster 13 | Cluster 14 | Cluster 15 | Cluster 16 | Cluster 17 |
|----|-----------|-----------|-----------|-----------|-----------|-----------|-----------|-----------|-----------|------------|------------|------------|------------|------------|------------|------------|------------|
| 1  | Igfbp6    | Mgp       | Igfbp5    | Igfbp5    | Hmgb2     | Sept7     | G0s2      | Dcn       | Acta2     | Tcf21      | Cdkn1c     | Penk       | Upk3b      | Rgs5       | Dcn        | Dlk1       | mt-Atp6    |
| 2  | Igfbp5    | Dkk1      | Aldh1a2   | Aldh1a2   | Tyms      | Dcn       | Ace2      | Hsp90b1   | Tagln     | Penk       | Pfn2       | Cdkn1c     | Sparc      | Ndufa4l2   | Dlk1       | Meg3       | mt-Cytb    |
| 3  | Dlk1      | Aldh1a2   | Mest      | Mest      | Lig1      | Sparc     | Igfbp3    | Tcf21     | Hsp90b1   | Fbln1      | Wnt4       | Tmsb4x     | Crip1      | Mef2c      | Meg3       | Col1a1     | mt-Nd1     |
| 4  | Meg3      | Ptn       | Mgp       | Ntn1      | Dut       | Rgs5      | Ptn       | Hmcn1     | Tpm1      | Tuba1a     | Nts        | Neto2      | Krt19      | Gm13889    | Col1a1     | Itm2a      | mt-Co2     |
| 5  | Alcam     | Shisa3    | Fibin     | Aprt      | Rrm2      | Mfap4     | Col14a1   | Plac8     | Penk      | Col14a1    | Penk       | Dclk1      | Dlk1       | Tm4sf1     | Sparc      | Col3a1     | mt-Co3     |
| 6  | Rspo3     | Mest      | Mecom     | Cadm1     | Smc2      | Ndufa4l2  | S100a6    | Fbln5     | Pfn2      | Zeb2       | Tmsb4x     | Arl4a      | Rarres2    | Crip1      | Postn      | Dcn        | mt-Nd4     |
| 7  | Ntn1      | Igfbp5    | Cadm1     | Fibin     | Ranbp1    | Col1a1    | Plac8     | Col14a1   | Myl9      | Snai2      | Ncam1      | Sdc2       | Dmkn       | Kcnj8      | Col1a2     | Mfap5      | Igfbp5     |
| 8  | Gas1      | Hmgn2     | Gpc6      | Tgfbf     | Dek       | Ace2      | Clca3a1   | Col6a2    | Cldn11    | H2afz      | Nkd1       | Hoxa10     | Fabp5      | Mgp        | Col3a1     | H19        | mt-Nd2     |
| 9  | Mgp       | Nme1      | Ntn1      | Mecom     | Nasp      | Cst3      | Fbln5     | Meg3      | Smoc2     | S100a10    | Acta2      | Cd24a      | Igfbp6     | Sfrp2      | Lum        | Col1a2     | mt-Nd3     |
| 10 | Gsn       | Ran       | Aprt      | Gdnf      | Cks1b     | Col3a1    | Sept7     | Acta2     | Dcn       | Plac8      | Sdc2       | Nkd1       | Dcn        | Ptp4a3     | Sfrp2      | Tppp3      | Ebf1       |
| 11 | Cdkn1c    | Stmn1     | Adgrl2    | Mgp       | Top2a     | Crip1     | H19       | Tshz2     | Igfbp2    | Tmsb4x     | Epha4      | Lrriq1     | Eln        | Cox4i2     | Cst3       | Cdkn1c     | mt-Co1     |
| 12 | Aprt      | Fhl2      | Scx       | Isyna1    | Gmn       | Ccl11     | Sparc     | Cfh       | Sfrp1     | Tagln2     | Gas6       | Ncam1      | Prss23     | Akr1b7     | Cthrc1     | Igf2       | Malat1     |
| 13 | Ogn       | Eif5a     | Ptn       | Slc40a1   | Mcm7      | Angpt2    | Rasgrp2   | Sparc     | Cd24a     | Ace2       | Atp2b1     | Nts        | Krt14      | Col4a1     | Gas1       | Sparc      | Gm42418    |
| 14 | H19       | Slc25a5   | Gdnf      | Ccnd2     | Dctpp1    | Sfrp2     | Peg3      | G0s2      | Ncam1     | G0s2       | Vcan       | Vcan       | Col1a1     | Igfbp7     | Mfap4      | Cthrc1     | Dkk1       |
| 15 | Serping1  | Mecom     | Crabp2    | Shisa3    | Mgp       | Col1a2    | Tagln2    | Igfbp3    | Tmsb4x    | Bok        | Arl4a      | Tcf21      | Krt7       | Heyl       | Csrp2      | Clec3b     | AY036118   |
| 16 | Aldh1a2   | Hmgb1     | Alcam     | Pkm       | Pcna      | Bgn       | Ndufa4l2  | Col3a1    | Tpm2      | H2afy2     | Cd24a      | Trps1      | Slc9a3r1   | Fabp5      | Igf1       | Igfbp6     | Hbb-bs     |
| 17 | Col1a1    | Id2       | Rspo3     | Scx       | Ran       | Igfbp3    | Meg3      | Col1a1    | Col1a1    | Lbh        | Plekha5    | Pla2g4a    | Msln       | Cald1      | Cdkn1c     | Crip1      | Fbn2       |
| 18 | Cst3      | Id1       | Igfbp6    | Gpc6      | Slbp      | Ndrp2     | Vcam1     | Lox       | Cnn2      | Stmn1      | Sema5a     | Ccnd2      | Sfrp2      | Gata3      | H19        | Fbn1       | Son        |
| 19 | Fgfbp1    | Lsm4      | Shisa3    | Sub1      | Mcm5      | Pmepa1    | Tcf21     | Olfrl3    | Col1a2    | Cdo1       | Nfat5      | Serpine2   | Rspo1      | Itga1      | Gsn        | Postn      | Nrp1       |
| 20 | Smoc2     | Fibin     | Ptgr1     | Mfap4     | Hells     | Tm4sf1    | Serpib6b  | Pmp22     | Gas6      | Ptn        | Tagln      | Wnt4       | Lrrn4      | Pdgfrb     | Aspn       | Plagl1     | Emilin1    |
| 21 | Mest      | Ecm1      | Col4a4    | Tpi1      | Tk1       | Fhl1      | Igfbp7    | Col6a1    | Col3a1    | Basp1      | Hoxa10     | Cck        | Ezr        | Csrp2      | Agtr2      | Ly6a       | Meis2      |
| 22 | Ackr3     | Ptma      | Foxd1     | Adgrl2    | Dnajc9    | Igfbp7    | Nid1      | Ptch1     | Cxcl14    | Nkain4     | Myl9       | Ntm        | Meg3       | Sept4      | Serpinf1   | Col14a1    | Mecom      |
| 23 | Sparc     | Gdnf      | Ccnd2     | Hacd2     | Gins2     | Eln       | Gpc3      | Ace2      | Meg3      | Csrp1      | Tpm1       | Lef1       | Sulf1      | Dkk2       | Apoe       | Prss23     | Fbxl7      |
| 24 | Ptgis     | Cacybp    | Zbtb20    | Col4a4    | Tipin     | Col14a1   | Anxa2     | Tpm1      | Ptch1     | Ppp1r14a   | Lef1       | Col15a1    | S100a6     | Rasl11a    | Nfib       | S100a10    | Adgrl2     |
| 25 | Mfap4     | Hnrnpa1   | Tgfbf     | Acp6      | Slc25a5   | Heyl      | Serping1  | Lbh       | Jun       | Pja1       | Grem2      | Dach1      | Col3a1     | Ebf1       | Col14a1    | Krtdap     | Ccnt2      |
| 26 | Crabp2    | Foxd1     | Polr2m    | Polr2m    | Rpa2      | Col4a1    | Sept11    | Bok       | Atp2b1    | Marcks     | Dclk1      | Pfn2       | Hspb1      | Gng11      | Ogn        | Nrk        | Ptn        |
| 27 | Cpe       | Snrpf     | Reln      | Fhl2      | Cdk1      | Gm13889   | Fhl2      | Thbs2     | Dstn      | Rbp1       | Palld      | Sox4       | Gm12840    | Sparcl1    | S100a6     | Fstl1      | Lama4      |
| 28 | Fxyd6     | Polr2m    | Pbx1      | Bex2      | H2afz     | Tsc22d1   | Myl9      | Myl9      | Timp3     | Itga8      | Col15a1    | Plekha5    | Gas1       | Col4a2     | Col5a1     | Col5a1     | Ogt        |

|    |          |           |          |         |         |         |          |                            |         |             |         |         |         |          |         |          |          |
|----|----------|-----------|----------|---------|---------|---------|----------|----------------------------|---------|-------------|---------|---------|---------|----------|---------|----------|----------|
| 29 | Foxd1    | Txn1      | Meis1    | Cenpf   | Nme1    | Fbln5   | Emp2     | Peg3                       | Sostdc1 | Hmgn2       | Epb41l2 | Epha4   | Efemp1  | Nrp1     | Col6a1  | Fst      | mt-Nd5   |
| 30 | Ctsl     | Tm4sf1    | Kcnq1ot1 | Ptma    | Igfbp5  | Ifitm1  | Ifitm1   | Cldn11                     | Sparc   | Pla2g4a     | Mylk    | Ctbp2   | Bcam    | Reln     | Timp2   | Pi16     | Cltc     |
| 31 | Il33     | Prdx1     | Isyna1   | Rpl12   | Fam111a | Ltbp1   | Pmp22    | Pcolce                     | Vim     | Tuba1b      | Ranbp3l | Epb41l2 | Osr1    | Mustn1   | Cxcl12  | S100a6   | Reln     |
| 32 | Il17re   | Cox5a     | Meis2    | Zcchc7  | Dhfr    | Sept7   | S100a11  | Dpep1                      | Rarres2 | Plcb1       | Kif26b  | Kif26b  | Col1a2  | Abcc9    | Pcolce  | Serpinf1 | Nisch    |
| 33 | Plagl1   | Rbm3      | H19      | Npm1    | Mcm3    | Foxs1   | Mfge8    | Tagln                      | Olfml3  | Dlc1        | Ltbp1   | Sema5a  | Cd2ap   | Ren1     | Osr1    | Nbl1     | Pbx1     |
| 34 | Paqr6    | Ifitm3    | Myh10    | Eef1b2  | Lsm2    | Itga1   | Agtr1a   | Col1a2                     | Ckb     | Zfp503      | Id3     | Plcb1   | Plp2    | Notch3   | Akap12  | Ahnak    | Tcf4     |
| 35 | Ddah1    | Cenpa     | Actr3b   | Ssbp4   | Stmn1   | Ctsl    | Acta2    | Igfbp7                     | Lgals1  | Sept7       | Trps1   | Hmga2   | Lgals3  | Ndrg2    | Nrk     | Timp2    | mt-Nd4l  |
| 36 | C1qtnf2  | Arpc1b    | Sub1     | Hibadh  | Dtymk   | Colec11 | Cnn2     | Sfrp1                      | Mylk    | Olfml3      | Id4     | H2afz   | Cpe     | Gadd45b  | Cpe     | Col5a2   | Ptprd    |
| 37 | Nbl1     | H2afv     | Egr1     | Gja1    | Dtl     | Lmna    | S100a10  | Zeb2                       | Hoxa10  | Tubb5       | Snhg18  | Dach2   | S100a10 | Iqgap1   | Fmo1    | Fbn2     | Mef2c    |
| 38 | Cldn1    | Hnrmpa2b1 | Cldn1    | Ak2     | Aldh1a2 | Col4a2  | Lox      | Cdc42ep3                   | Id4     | Sept11      | Ccnd1   | Id4     | Nbl1    | Fos      | Matn2   | Gsn      | Hspa5    |
| 39 | Rbp1     | Fbn2      | Pkm      | Gapdh   | Mcm6    | Pdgfrb  | Col6a2   | Basp1                      | Bst2    | Hmgb2       | Pcdh10  | Malat1  | Nkain4  | Blmh     | Crip1   | Sema3d   | Cadm1    |
| 40 | Tmem176b | Ccnd2     | Fbn2     | P3h4    | Snrpd1  | Meg3    | Ppp1r14a | Vim                        | Fn1     | Rem1        | Igfbp2  | Ccnd1   | Aebp1   | Nrarp    | Fst     | Akap12   | F2r      |
| 41 | Ybx3     | Anp32b    | Adamts5  | Zbtb20  | Anp32b  | Nrk     | Tshz2    | Ccdc80                     | Cfh     | Csrp2       | Bdnf    | Snhg18  | Ptgis   | Zfhx3    | Tmem158 | Htra3    | Sptbn1   |
| 42 | Fosb     | Set       | Hnrmpa1  | Adamts5 | Fibin   | Cald1   | Zeb2     | Cxcl12                     | Tuba1a  | Des         | Fgfr2   | Ogfr1   | Alad    | Btg1     | Tsc22d1 | Col6a3   | Atp1a1   |
| 43 | Omd      | Hspd1     | Rpl12    | Ndufa4  | Spc24   | App     | Dpep1    | Cpe                        | Bok     | Fblm1603040 | Cpq     | Basp1   | Emp2    | Hmgcs2   | Col6a2  | Cd34     | Hba-a1   |
| 44 | C1qtnf3  | Odc1      | Tnnt1    | Cfap36  | Ung     | Nrp1    | Tmsb10   | Mbnl2                      | Nexn    | 8B16Rik     | Cnn2    | Tanc1   | Timp2   | Mfge8    | Aes     | Klf2     | Aplp2    |
| 45 | Upk3bl   | Pdgfrb    | Slc40a1  | Tma7    | Cdca7   | Mmp14   | Col6a1   | Epha3                      | Col23a1 | Serpine2    | Fzd10   | Fbln1   | Upk1b   | Map3k7cl | Eln     | Kcnq1ot1 | App      |
| 46 | Col12a1  | Serbp1    | Ptgis    | Ptgr1   | Atad2   | Aspn    | Maf      | Pkdcc                      | Tcf21   | Frem1       | Csrp1   | Lhfp12  | Spint2  | Tuba1c   | Gnas    | Csrp2    | Trip12   |
| 47 | Gsta4    | Asb4      | Nme1     | Loxl1   | Smc4    | S100a10 | Tuba1a   | Ogn                        | Col6a2  | Abrac1      | Dach1   | Tmtc4   | Fbln2   | Angpt2   | Lmna    | Nid1     | Nfib     |
| 48 | Tmem176a | Loxl1     | Ica1     | Ybx3    | Hat1    | Loxl1   | Itga1    | Ctsl                       | Zeb2    | Mmp2        | Corin   | Enpep   | Cd151   | Ier2     | Col5a2  | Col6a1   | Ctnnb1   |
| 49 | Hspb1    | Hmgb2     | Hic1     | Sertad4 | Mrpl18  | Cygb    | Cald1    | Cnn2                       | Negr1   | Hmgb3       | Sct     | Jun     | Cxadr   | Ltbp1    | Jund    | Itih5    | Kcnq1ot1 |
| 50 | Folr1    | Rpl12     | Eef1b2   | Cxcl12  | H2afx   | Postn   | Fabp5    | Ccl21a_ENSMU_SG00000094686 | Wnt4    | Lgals1      | Cck     | Nfat5   | Anxa2   | Serpini1 | Prrx1   | Cd248    | Gpc6     |

882 **Supplemental Table 1:** List of top 50 differentially expressed genes (DEGs) in each cluster when compared to all clusters. Our  
883 annotations for each cluster as described in the text are as follows: Cortical Interstitium: Clusters 1-3; Nephrogenic Interstitium: Clusters  
884 4-5; Proximal Tubule Interstitium: Clusters 6-8; Interstitium Medullary to Proximal Tubule (Outer Medulla): Cluster 9; Outer strip of inner



885 medulla Interstitium: Cluster 10; Papillary Interstitium: Clusters 10-12; Ureteric Interstitium: Cluster 13; Vascular Smooth Muscle:  
886 Cluster 14; Pericyte: Cluster 15; Mesangium: Cluster 16; Indeterminate Signature: Cluster 17.

887

888 **Supplemental Table 2:** separate file

889

890 **Supplemental Table 2:** List of stromal gene against which mRNA in situ hybridizations were conducted, the image of the in situ, along  
891 with the rank of the gene in the DEG list for each cluster. Yellow indicates the gene was ranked in the top 100 DEGs, while grey  
892 indicates the gene was not present in the DEG list for that specific cluster.

893

894

895
